# Supplementary material for: Association between maternal vitamin D deficiency and small for gestational age: evidence from a meta-analysis of prospective cohort studies
Source: PubMed Central journal article supplement (PMC5629738; doi:10.1136/bmjopen-2017-016404), 2017-08-27
Supplement: bmjopen-2017-016404.draft_revisions.pdf [file bmjopen-2017-016404.draft_revisions.pdf]

# BMJ Open

BMJ Open is committed to open peer review. As part of this commitment we make the peer review history of every article we publish publicly available.

When an article is published we post the peer reviewers' comments and the authors' responses online. We also post the versions of the paper that were used during peer review. These are the versions that the peer review comments apply to.

The versions of the paper that follow are the versions that were submitted during the peer review process. They are not the versions of record or the final published versions. They should not be cited or distributed as the published version of this manuscript.

BMJ Open is an open access journal and the full, final, typeset and author-corrected version of record of the manuscript is available on our site with no access controls, subscription charges or pay-per-view fees (<http://bmjopen.bmj.com>).

If you have any questions on BMJ Open's open peer review process please email [info.bmjopen@bmj.com](mailto:info.bmjopen@bmj.com)

# BMJ Open

## Association between maternal vitamin D deficiency and small for gestational age: evidence from a meta-analysis of prospective cohort studies

|                                 |                                                                                                                                                                                                                                                                                                     |
|---------------------------------|-----------------------------------------------------------------------------------------------------------------------------------------------------------------------------------------------------------------------------------------------------------------------------------------------------|
| Journal:                        | <i>BMJ Open</i>                                                                                                                                                                                                                                                                                     |
| Manuscript ID                   | bmjopen-2017-016404                                                                                                                                                                                                                                                                                 |
| Article Type:                   | Research                                                                                                                                                                                                                                                                                            |
| Date Submitted by the Author:   | 11-Feb-2017                                                                                                                                                                                                                                                                                         |
| Complete List of Authors:       | Chen, Yao; Anhui Medical University, School of Public Health<br>Li, Si; Anhui Medical University, School of Public Health<br>Wu, Xiaoyan<br>Zhu, Beibei; Anhui Medical University, School of Public Health<br>Tao, Fangbiao; Anhui Provincial Key Laboratory of Population Health and Aristogenics, |
| <b>Primary Subject Heading</b>: | Public health                                                                                                                                                                                                                                                                                       |
| Secondary Subject Heading:      | Nutrition and metabolism                                                                                                                                                                                                                                                                            |
| Keywords:                       | vitamin D, small for gestational age, cohort study, meta-analysis                                                                                                                                                                                                                                   |
|                                 |                                                                                                                                                                                                                                                                                                     |

SCHOLARONE™  
Manuscripts

1  
2  
3 **Association between maternal vitamin D deficiency and small for gestational age:**  
4 **evidence from a meta-analysis of prospective cohort studies**  
5  
6

7 Yao Chen<sup>1</sup>, Si Li<sup>2</sup>, Xiaoyan Wu<sup>1,3</sup>, Beibei Zhu<sup>1,3</sup>, Fangbiao Tao<sup>1,3</sup>  
8

9 <sup>1</sup>Department of Maternal, Child and Adolescent Health, School of Public Health,  
10 Anhui Medical University, Hefei, China  
11

12 <sup>2</sup>Department of Epidemiology and Biostatistics, School of Public Health, Anhui  
13 Medical University, Hefei, China.  
14

15 <sup>3</sup>Anhui Provincial Key Laboratory of Population Health and Aristogenics, Hefei,  
16 China  
17  
18  
19

20 **Correspondence to:** Fangbiao Tao, Department of Maternal, Child and Adolescent  
21 Health, School of Public Health, Anhui Medical University, 81Meishan Road, Hefei,  
22 Anhui, 230032, P.R.China. Tel.: +86 551 65161169.  
23  
24

25 Email: fbtao@ahmu.edu.cn  
26  
27  
28  
29  
30  
31  
32  
33  
34  
35  
36  
37  
38  
39  
40  
41  
42  
43  
44  
45  
46  
47  
48  
49  
50  
51  
52  
53  
54  
55  
56  
57  
58  
59  
60

**ABSTRACT**

**Objective:** To estimate whether maternal vitamin D deficiency during pregnancy is associated with small for gestational age (SGA).

**Methods:** A comprehensive literature search of PubMed, Cochrane Library, EMBASE and Elsevier ScienceDirect library was conducted to identify relevant articles of prospective cohort studies in English, with the last report up to February 2017. Pooled odds ratio (OR) and corresponding 95% confidence interval (95% CI) were used to evaluate the correlation in either random or fixed effects model according to between-study heterogeneity.

**Results:** Thirteen cohort studies are included in this meta-analysis. Maternal with circulating 25-hydroxyvitamin D [25(OH)D] deficiency experienced had an increased risk of SGA (pooled OR=1.574; 95% CI 1.124 to 2.204;  $P<0.01$ ). Subgroup analysis revealed that pregnant women with a vitamin D level below 10 ng/ml (OR=2.219, 95% CI 1.480 to 3.325) and below 15 ng/ml (OR=1.532, 95% CI 1.046 to 2.246) had a significantly increased risk of SGA, however, this association didn't exist in subgroup of below 20 ng/ml (OR=1.424, 95% CI 0.828 to 2.449). When stratified according to blood sampling weeks, we found only blood sampling from the second trimester showed a positive association (OR=1.544, 95% CI 1.088 to 2.192)

**Conclusion:** Our meta-analysis suggests that vitamin D deficiency is associated with an increased risk of SGA and the optimal cutoff and critical timing need further investigation.

**Keywords:** vitamin D; small for gestational age; cohort study; meta-analysis.

**Strengths and limitations of this study:** This study only included prospective cohort studies, which have more advantages than case-control studies. Subgroups analysis of this study presented more thorough understanding of current evidence. Quality of each cohort study, heterogeneity test, sensitivity analysis and publication bias were conducted. Different definition of vitamin D deficiency, insufficiency or sufficiency might have influenced the result. Substantial heterogeneity existed among several outcomes.

## INTRODUCTION

Vitamin D is fat-soluble and a steroid hormone recognized for its major role in calcium metabolism and bone health.<sup>1</sup> Vitamin D deficiency or insufficiency has become a global public health issue,<sup>2</sup> especially for pregnant women, among whom the highest deficiency rate is up to 84% according to a multiethnic population survey in Norway.<sup>3</sup> Several large studies have depicted the associations of maternal vitamin D deficiency with various adverse maternal and fetal outcomes<sup>4-6</sup> including SGA.

SGA are defined as smaller in size for their own gestational age, most commonly recognized as a weight below the 10th percentile for corresponding gestational age.<sup>7,8</sup> The incidence of SGA was 9.7% worldwide<sup>9</sup> with a growth tendency. Infants born to SGA have much higher neonatal morbidity and mortality.<sup>10</sup> Even worse, it might also do a lot harm to other well-beings throughout childhood to adulthood, such as neurocognitive impairment, poor school performance and short stature, as well as increased the risk of diabetes,<sup>11</sup> cardiovascular disease<sup>12</sup> and kidney disease.<sup>13</sup>

Although many studies have focused on the association between maternal vitamin D status and SGA, the results of these studies remain inconsistent. A prospective cohort study in Netherlands examining vitamin D concentrations in 3,730 pregnant women at 12-14 weeks of gestation shows that infants born to mothers with vitamin D deficiency had an increased risk of SGA compared with adequate vitamin D levels.<sup>14</sup> Subsequently, Gernand et al.<sup>15</sup> reported that the vitamin D levels below 15 ng/ml group had significantly higher risk of SGA. However, some other studies demonstrated no association between vitamin D status and SGA.<sup>16,17</sup>

Given the blurred picture of this issue, we attempted to summarize current best quality of evidences and conduct a meta-analysis of prospective cohort studies to answer whether vitamin D deficiency in pregnant women is associated with SGA.

## MATERIALS AND METHODS

### Data sources, search strategy, and selection criteria

A systematic literature search was performed using the PubMed, Elsevier

1  
2  
3 ScienceDirect and Cochrane Library databases to find out all relevant publications  
4 until February 2017. No restrictions were placed on maternal age, study design or  
5 language. The following main search terms were used:  
6  
7 ('vitamin D' or 'cholecalciferol' or '25-hydroxyvitamin D' or '25(OH)D' and 'SGA'  
8 or 'small for gestational age' or 'small-for-gestation-age' or 'small size for gestational  
9 age')

### 14 15 16 17 **Selection Criteria**

18 We first screened the titles and abstracts of all the articles to identify the possible  
19 eligible studies, and then read the full articles to include eligible studies. The studies  
20 fit into the meta-analysis were selected according to the following criteria: 1) cohort  
21 studies evaluated the association between vitamin D status and risk of SGA; 2) studies  
22 with data in the form of effect estimate [odds ratio (OR) or risk ratio (RR)] and  
23 corresponding 95% confidence interval (CI) or reported data to calculate them; 3)  
24 maternal blood samples were taken for assessing 25(OH)D before or at delivery; 4)  
25 studies with pregnant women suffering from other metabolic disease were excluded.  
26  
27  
28  
29  
30  
31  
32  
33  
34

### 35 36 **Data extraction and quality evaluation**

37 Two investigators respectively reviewed all abstracts for related studies, and read full  
38 texts of eligible literatures, extracted data using a standardized form and assessed  
39 study quality. Disagreements were resolved by discussion and by consulting a third  
40 investigator. The following data were collected from each study: the first author name,  
41 nation, publish year, the average age and pre-pregnancy body mass index (BMI) of  
42 study populations, current gestational week of blood sampling, assay methods of  
43 serum/plasma vitamin D levels measured and sample size. If original important data  
44 were unavailable, we contacted the corresponding author by e-mail to obtain further  
45 details. Finally, we assessed the eligible studies based on  
46 Newcastle-Ottawa Scale (NOS) system. This scale ranging from 0 to 9 contains nine  
47 items (1 point for each) in three parts: selection (four items), comparability (two items)  
48  
49  
50  
51  
52  
53  
54  
55  
56  
57  
58  
59  
60

1  
2  
3 and exposure or outcomes (three items). Scores ranging from 0-3 were deemed to  
4 poor quality, scores ranging from 4 to 6 were deemed to moderate quality and scores  
5 surpassing 7 were deemed to high quality.  
6  
7  
8  
9

### 10 **Statistical Analysis**

11  
12 The data extracted from eligible studies were in the form of effect estimate [odds ratio  
13 (OR) or risk ratio (RR)] and corresponding 95% confidence interval (CI). Due to the  
14 low level of the morbidity of SGA, the value of OR was approximately equal to RR.<sup>18</sup>  
15  
16 Meta-analysis was performed using STATA package version 12.0 (Stata Corporation,  
17 College Station, TX, USA). The ORs and 95% CIs for normal vitamin D levels versus  
18 deficient vitamin D levels from each study were combined to calculate the estimated  
19 pooled OR, 95% CI and *P* value. Q-statistic test and the I-square ( $I^2$ ) test were used to  
20 estimate the heterogeneity among different studies.<sup>19</sup> The fixed-effects model was  
21 used for meta-analysis when  $I^2$  was under 50% and *P* value surpassed 0.05, otherwise,  
22 the random-effects model was used.<sup>20</sup> To explore the sources of heterogeneity and the  
23 various results of subgroups, Subgroup analysis was carried out based on status of  
24 ethnicity, cut-off values, study quality, adjustment of critical confounders, sample size,  
25 and current gestation of blood sampling. A sensitivity analysis was conducted to  
26 determine the stability and reliability of the results by leave one out at a time and  
27 checking the consistency of the overall effect estimate. Funnel plots were used to  
28 qualitatively assess the publication bias, and Egger's and Begg's tests were also used  
29 to quantitatively assess publication bias.<sup>21 22</sup>  
30  
31  
32  
33  
34  
35  
36  
37  
38  
39  
40  
41  
42  
43  
44  
45

## 46 **RESULTS**

### 47 **Description of included studies**

48  
49 A total of 1734 literatures were identified for initial review using search strategies as  
50 described. 1537 literatures were removed according to the inclusion and exclusion  
51 criteria (figure 1). Because of the unavailability of data, 4 studies were excluded.  
52  
53  
54  
55  
56  
57  
58  
59  
60

1  
2  
3 Finally, 13 cohort studies<sup>4 14-17 23-30</sup> were included in the meta-analysis, including  
4  
5 28285 pregnant women.  
6

7 Characteristics and methodological quality of 13 studies are presented in table 1:  
8  
9 The population sources of studies were Caucasian (9 studies) and Asian (4 studies).  
10  
11 The average age of the pregnant women of those studies was < 30 years old (4 studies)  
12  
13 and >30 years old (5 studies). Of the 13 studies, the average pre-pregnancy BMI of 7  
14  
15 studies were below 25 kg/m<sup>2</sup> and 3 studies were above 25 kg/m<sup>2</sup>. 10 studies have  
16  
17 adjusted for confounders and 3 studies have not. 6 studies adopted blood during first  
18  
19 trimester, 5 studies were second trimester. Furthermore, 7 studies assessed the  
20  
21 serum/plasma levels of vitamin D by the way of LS-MS, 6 studies used other methods.  
22  
23 Finally, the degrees of NOS score were high levels (9 studies) and low levels (4  
24  
25 studies).  
26  
27

### 28 **Meta-analysis results**

29  
30 The Coherence Q test showed the existence of heterogeneity in the meta-analysis  
31  
32 ( $I^2=84.1\%$ ;  $P<0.001$ ), so the random-effects model was applied. The overall results  
33  
34 showed that maternal vitamin D deficiency during pregnancy is significantly  
35  
36 associated with an increased risk of SGA (pooled OR=1.574; 95% CI 1.124 to 2.204;  
37  
38  $P<0.01$ ) and the forest plot showed the details (figure 2).  
39  
40

### 41 **Subgroup analysis**

42  
43 Due to the existence of heterogeneity, subgroup analysis was carried out to explore  
44  
45 the possible sources of heterogeneity in the meta-analysis (table 2). The subgroups  
46  
47 were based on status of ethnicity, cut-off values of vitamin D levels, sample size, NOS  
48  
49 score levels, whether adjusted for critical confounders and gestational week of blood  
50  
51 sampling. The pregnant women in Caucasian, vitamin D deficiency markedly  
52  
53 increased the risk of SGA. Moreover, maternal vitamin D deficiency during  
54  
55 pregnancy was significantly associated with SGA in studies with high study quality,  
56  
57 the similar results were also observed in studies with blood sampling during second  
58  
59  
60



1  
2  
3 trimester and the heterogeneity observably reduced (pooled OR=1.544; 95% CI 1.088  
4 to 2.192;  $I^2=48.2\%$ ;  $P=0.102$ ). Furthermore, subgroup analysis according to whether  
5 adjusted for critical confounders, the NOS score levels and sample size of study all  
6 showed significant results, and the studies with the cut-off values of vitamin D status  
7 <15 ng/ml or <10 ng/ml showed markedly relevance between SGA and vitamin D,  
8 noteworthy, the heterogeneity significant decline (pooled OR=1.532; 95% CI 1.04 to  
9 2.246;  $I^2=73.2\%$ ;  $P=0.054$  vs. pooled OR=2.219; 95% CI 1.046 to 2.246;  $I^2=0$ ;  
10  $P=0.446$ ).

### 20 **Sensitivity analysis and publication bias**

21 To evaluate the stability of our results, sensitivity analysis was carried out and the  
22 results revealed that the OR and 95% CI were stable when any one study was  
23 excluded using random-effect methods (table 3). There was also no publication bias  
24 after carrying out Begg's test ( $P=0.760$ ) and Egger's regression test ( $P=0.852$ ), the  
25 funnel plot showed the details (figure 3).

### 33 **DISCUSSION**

34 The prevalence of vitamin D deficiency during pregnancy and its association with risk  
35 of SGA caught more and more attentions. Current meta-analysis of prospective cohort  
36 studies suggests that vitamin D deficiency is significantly associated with an  
37 increased risk of SGA. No publication bias was detected and sensitive analysis  
38 showed no single study dramatically influences the results, which indicated that the  
39 results of our meta-analysis are stable and reliable.

40 Our study is in line with several previous studies. A previous meta-analysis showed  
41 that low maternal vitamin D levels during pregnancy may be associated with an  
42 increased risk of SGA, gestational diabetes mellitus, preterm birth.<sup>5</sup> Similarly, another  
43 vital meta-analysis also suggested that vitamin D insufficiency is associated with an  
44 increased risk of SGA, preeclampsia, and bacterial vaginosis.<sup>6</sup> However, those studies  
45 included both case-control and prospective cohort studies and did not include latest  
46  
47  
48  
49  
50  
51  
52  
53  
54  
55  
56  
57  
58  
59  
60

1  
2  
3 published cohort studies, and did not evaluate the association in specific subgroup  
4 analysis. Moreover, the cut-off values for the vitamin D status differed between  
5 different studies. Thus, we conducted this meta-analysis to provide stronger evidence  
6 for the association between vitamin D and SGA.  
7  
8  
9

10 Heterogeneity test (the Coherence Q test) showed significant heterogeneity existed  
11 among studies. We explored the potential influential factors for the results by  
12 performing a subgroup analysis. And we obtained positive results from the following  
13 subgroups: Caucasian population, blood sampling from the second trimester, sample  
14 size exceeded 1000, the studies of high quality and adjusted potential confounder  
15 factors. A case-control study conducted in UK measured the 25(OH)D levels of  
16 maternal at 11-13 weeks of gestation and showed that serum 25(OH)D levels were  
17 decreased in Caucasian women that deliver SGA, but was not observed in African  
18 women,<sup>31</sup> which was consistent with our results. Furthermore, we found pregnant  
19 women with a vitamin D level below 10 ng/ml (OR=2.219, 95% CI 1.480 to 3.325)  
20 and below 15 ng/ml (OR=1.532, 95% CI 1.046 to 2.246) had a significantly increased  
21 risk of SGA, however, such association was not obvious in the subgroup of 25(OH)D  
22 <20 ng/ml. Therefore, the cut-offs of vitamin D deficiency needs further exploration  
23  
24  
25  
26  
27  
28  
29  
30  
31  
32  
33  
34

35 The underlying mechanism of vitamin D deficiency increases risk of SGA is not  
36 entirely clear but might be explained by the inflammatory response. Vitamin D  
37 deficiency can increase the levels of proinflammatory cytokines, leading to oxidative  
38 stress. Lower 25(OH)D status is associated with increased vascular endothelial cell  
39 expression of nuclear factor  $\kappa$ B (NF $\kappa$ B) and interleukin 6 (IL-6), and with decreased  
40 of vitamin D receptor (VDR) and 1- $\alpha$  hydroxylase.<sup>32</sup> A study reported that the levels  
41 of pro-inflammatory cytokines in cord blood of SGA are significantly higher than that  
42 in normal-born infants.<sup>33</sup> Mullins et al.<sup>34</sup> show that the offspring pregnant women of  
43 SGA contained higher tumor necrosis factor (TNF- $\alpha$ ) than normal offspring of  
44 pregnant women, and as an important inflammatory factor, TNF- $\alpha$  inhibited placental  
45 hormone synthesis and stimulated calcitriol catabolism by regulating enzymes.<sup>35</sup>  
46 Vitamin D may also play an important role in innate and adaptive immunity by  
47  
48  
49  
50  
51  
52  
53  
54  
55  
56  
57  
58  
59  
60

1  
2  
3 inhibiting the pathway of decidual NFκB to reduce the inflammatory response, since  
4 NFκB is a main transcription factor of inflammatory mediators.<sup>36</sup>  
5  
6

7 Maternal vitamin D deficiency is prevalent, the extent of which can be influenced  
8 by many variables including ethnicity, region, skin pigmentation, sun exposure,  
9 season, age, vitamin D supplementation and others.<sup>37</sup> The American Association of  
10 Endocrinology recommended that pregnant women require at least 600 IU/d of  
11 vitamin D and confirmed that at least 1500-2000 IU/d of vitamin D may be needed to  
12 keep a blood level of vitamin D above 30 ng/ml.<sup>38</sup> However, the recommendations of  
13 pregnant women vitamin D supplementation is scanty. At present, vitamin D  
14 supplementation during pregnancy has been suggested as an intervention to prevent  
15 adverse pregnancy outcomes.<sup>39</sup> A randomized controlled trial reported that maternal  
16 vitamin D supplementation of 2000 and 4000 IU/d appeared safe during pregnancy,  
17 and the most effective in optimizing serum vitamin D concentrations in mothers and  
18 their infants was 4000 IU/d,<sup>40</sup> this result was consistent with another randomized  
19 controlled trial in Pakistan.<sup>41</sup> Low vitamin D levels during pregnancy could increase  
20 the risk of SGA, however, vitamin D supplementation did not significantly reduce the  
21 risk of SGA (OR=0.78, 95% CI 0.50 to 1.21).<sup>42</sup> Therefore, we need larger randomized  
22 controlled trials to assess the value of these interventions in the future, which has a  
23 significant impact on the guidance of the perinatal period care.  
24  
25  
26  
27  
28  
29  
30  
31  
32  
33  
34  
35  
36  
37  
38

39 Our study has several strengths. First, to provide more reliable evidence, we only  
40 included prospective cohort studies, which have more advantages than case-control  
41 studies as we all familiar with. Second, no publication bias existing, indicating that  
42 the included results may be unbiased and credible. Third, subgroups analysis of our  
43 study presented more thorough understanding of current evidence. Several limitations  
44 should also be acknowledged. First, the association between maternal vitamin D  
45 status and SGA risk could be affected by confounding factors such as pre-pregnancy  
46 BMI, age, education, race and exposure sunlight, however, not all studies are control  
47 these confounding factors in our meta-analysis. Second, different definition of vitamin  
48 D deficiency, insufficiency or sufficiency might have influenced the result. Third,  
49  
50  
51  
52  
53  
54  
55  
56  
57  
58  
59  
60

1  
2  
3 pooled data without detail individual information were used to performed  
4 meta-analysis, which restricted us to get more comprehensive results.  
5  
6  
7

## 8 9 **CONCLUSIONS**

10 The present study indicates that low vitamin D levels is associated with an increased  
11 risk of SGA. Further confirmation of these findings in larger sample size studies is  
12 required. The role of vitamin D in the pathogenesis of SGA should be emphasized. As  
13 well, early screening for vitamin D deficiency of pregnant women may be necessary  
14 under the background of this study.  
15  
16  
17  
18  
19

20  
21  
22 **Contributors** FT contributed to study design; SL, XW and BZ contributed analysis  
23 tools and methods; YC analyzed the data and drafted the manuscript; BZ and FT  
24 revised the manuscript. All authors read and approved the final version of the  
25 manuscript.  
26  
27  
28  
29

30  
31  
32 **Funding** This work is grateful for the financial support offered by the National  
33 Natural Science Foundation of China (81330068, 81573168)  
34  
35

36  
37  
38 **Competing interests** None declared.  
39  
40  
41  
42  
43  
44  
45  
46  
47  
48  
49  
50  
51  
52  
53  
54  
55  
56  
57  
58  
59  
60

## REFERENCES

1. Finberg L. Vitamin D deficiency and rickets. *J Pediatr Endocrinol Metab* 2006; 19:203.
2. Palacios C, Gonzalez L. Is vitamin D deficiency a major global public health problem? *J Steroid Biochem Mol Biol* 2014; 144 Pt A:138-145.
3. Eggemoen AR, Falk RS, Knutsen KV, et al. Vitamin D deficiency and supplementation in pregnancy in a multiethnic population-based cohort. *BMC pregnancy and childbirth* 2016; 16:7.
4. Chen YH, Fu L, Hao JH, et al. Maternal vitamin D deficiency during pregnancy elevates the risks of small for gestational age and low birth weight infants in Chinese population. *J Clin Endocrinol Metab* 2015; 100:1912-1919.
5. Wei SQ, Qi HP, Luo ZC, et al. Maternal vitamin D status and adverse pregnancy outcomes: a systematic review and meta-analysis. *J Matern Fetal Neonatal Med* 2013; 26:889-899.
6. Aghajafari F, Nagulesapillai T, Ronksley PE, et al. Association between maternal serum 25-hydroxyvitamin D level and pregnancy and neonatal outcomes: systematic review and meta-analysis of observational studies. *BMJ* 2013; 346:f1169.
7. Mikolajczyk RT, Zhang J, Betran AP, et al. A global reference for fetal-weight and birthweight percentiles. *Lancet* 2011; 377:1855-1861.
8. Hoftiezer L, Hukkelhoven CW, Hogeveen M, et al. Defining small-for-gestational-age: prescriptive versus descriptive birthweight standards. *Eur J Pediatr* 2016; 175:1047-1057.
9. Ding G, Tian Y, Zhang Y, et al. Application of a global reference for fetal-weight and birthweight percentiles in predicting infant mortality. *BJOG* 2013; 120(13):1613-1621.
10. Christian P, Murray-Kolb LE, Tielsch JM, et al. Associations between preterm birth, small-for-gestational age, and neonatal morbidity and cognitive function among school-age children in Nepal. *BMC pediatrics* 2014; 14:58.
11. de Zegher F, Sebastiani G, Diaz M, et al. Body composition and circulating high-molecular-weight adiponectin and IGF-I in infants born small for gestational age: breast-versus formula-feeding. *Diabetes* 2012; 61:1969-1973.
12. Wolfenstetter A, Simonetti GD, Poschl J, et al. Altered cardiovascular rhythmicity in children born small for gestational age. *Hypertension* 2012; 60:865-870.
13. Aly H, Davies J, El-Dib M, et al. Renal function is impaired in small for gestational age premature infants. *J Matern Fetal Neonatal Med* 2013; 26:388-391.
14. Leffelaar ER, Vrijkotte TG, van Eijsden M. Maternal early pregnancy vitamin D status in relation to fetal and neonatal growth: results of the multi-ethnic Amsterdam Born Children and their Development cohort. *Br J Nutr* 2010; 104:108-117.
15. Gernand AD, Simhan HN, Klebanoff MA, et al. Maternal serum 25-hydroxyvitamin D and measures of newborn and placental weight in a U.S. multicenter cohort study. *J Clin Endocrinol Metab* 2013; 98:398-404.
16. Nobles CJ, Markenson G, Chasan-Taber L. Early pregnancy vitamin D status and risk for adverse maternal and infant outcomes in a bi-ethnic cohort: the Behaviors Affecting Baby and You (B.A.B.Y.) Study. *Br J Nutr* 2015; 114:2116-2128.
17. Ong YL, Quah PL, Tint MT, et al. The association of maternal vitamin D status with infant birth outcomes, postnatal growth and adiposity in the first 2 years of life in a multi-ethnic Asian population: the Growing Up in Singapore Towards healthy Outcomes (GUSTO) cohort study.

- 1  
2  
3 *Br J Nutr* 2016; 116:621-631.
- 4 18. Gagne JJ, Power MC. Anti-inflammatory drugs and risk of Parkinson disease: a meta-analysis.  
5 *Neurology* 2010; 74:995-1002.
- 6 19. Takkouche B, Cadarso-Suarez C, Spiegelman D. Evaluation of old and new tests of  
7 heterogeneity in epidemiologic meta-analysis. *Am J Epidemiol* 1999; 150:206-215.
- 8 20. Higgins JP, Thompson SG, Deeks JJ, et al. Measuring inconsistency in meta-analyses. *BMJ*  
9 2003; 327:557-560.
- 10 21. Egger M, Davey Smith G, Schneider M, et al. Bias in meta-analysis detected by a simple,  
11 graphical test. *BMJ* 1997; 315:629-634.
- 12 22. Begg CB, Mazumdar M. Operating characteristics of a rank correlation test for publication  
13 bias. *Biometrics* 1994; 50:1088-1101.
- 14 23. Burris HH, Rifas-Shiman SL, Camargo CA, et al. Plasma 25-hydroxyvitamin D during pregnancy  
15 and small-for-gestational age in black and white infants. *Ann Epidemiol* 2012; 22:581-586.
- 16 24. Zhou J, Su L, Liu M, et al. Associations between 25-hydroxyvitamin D levels and pregnancy  
17 outcomes: a prospective observational study in southern China. *Eur J Clin Nutr* 2014;  
18 68:925-930.
- 19 25. Choi R, Kim S, Yoo H, et al. High prevalence of vitamin D deficiency in pregnant Korean  
20 women: the first trimester and the winter season as risk factors for vitamin D deficiency.  
21 *Nutrients* 2015; 7:3427-3448.
- 22 26. Kiely ME, Zhang JY, Kinsella M, et al. Vitamin D status is associated with uteroplacental  
23 dysfunction indicated by pre-eclampsia and small-for-gestational-age birth in a large  
24 prospective pregnancy cohort in Ireland with low vitamin D status. *Am J Clin Nutr* 2016;  
25 104:354-361.
- 26 27. Scholl TO, Chen X, Stein TP. Maternal calcium metabolic stress and fetal growth. *Am J Clin*  
27 *Nutr* 2014; 99:918-925.
- 28 28. Boyle VT, Thorstensen EB, Mourath D, et al. The relationship between 25-hydroxyvitamin D  
29 concentration in early pregnancy and pregnancy outcomes in a large, prospective cohort. *Br J*  
30 *Nutr* 2016; 116:1409-1415.
- 31 29. van den Berg G, van Eijsden M, Vrijkotte TG, et al. Suboptimal maternal vitamin D status and  
32 low education level as determinants of small-for-gestational-age birth weight. *Eur J Nutr* 2013;  
33 52:273-279.
- 34 30. Miliku K, Vinkhuyzen A, Blanken LM, et al. Maternal vitamin D concentrations during  
35 pregnancy, fetal growth patterns, and risks of adverse birth outcomes. *Am J Clin Nutr* 2016;  
36 103:1514-1522.
- 37 31. Ertl R, Yu CK, Samaha R, et al. Maternal serum vitamin D at 11-13 weeks in pregnancies  
38 delivering small for gestational age neonates. *Fetal Diagn Ther* 2012; 31:103-108.
- 39 32. Jablonski KL, Chonchol M, Pierce GL, et al. 25-Hydroxyvitamin D deficiency is associated with  
40 inflammation-linked vascular endothelial dysfunction in middle-aged and older adults.  
41 *Hypertension* 2011; 57:63-69.
- 42 33. Lausten-Thomsen U, Olsen M, Greisen G, et al. Inflammatory markers in umbilical cord blood  
43 from small-for-gestational-age newborns. *Fetal Pediatr Pathol* 2014; 33:114-118.
- 44 34. Mullins E, Prior T, Roberts I, et al. Changes in the maternal cytokine profile in pregnancies  
45 complicated by fetal growth restriction. *Am J Reprod Immunol* 2012; 68:1-7.
- 46 35. Diaz L, Noyola-Martinez N, Barrera D, et al. Calcitriol inhibits TNF-alpha-induced  
47  
48  
49  
50  
51  
52  
53  
54  
55  
56  
57  
58  
59  
60

- 1  
2  
3 inflammatory cytokines in human trophoblasts. *J Reprod Immunol* 2009; 81:17-24.
- 4 36. Cohen-Lahav M, Shany S, Tobvin D, et al. Vitamin D decreases NFkappaB activity by increasing  
5 IkappaBalph levels. *Nephrol Dial Transplant* 2006; 21:889-897.
- 6 37. Bodnar LM, Simhan HN. Vitamin D may be a link to black-white disparities in adverse birth  
7 outcomes. *Obstet Gynecol Surv* 2010; 65:273-284.
- 8 38. Holick MF, Binkley NC, Bischoff-Ferrari HA, et al. Evaluation, treatment, and prevention of  
9 vitamin D deficiency: an Endocrine Society clinical practice guideline. *J Clin Endocrinol Metab*  
10 2011; 96:1911-1930.
- 11 39. De-Regil LM, Palacios C, Lombardo LK, et al. Vitamin D supplementation for women during  
12 pregnancy. *Sao Paulo Med* 2016; 134:274-275.
- 13 40. Dawodu A, Saadi HF, Bekdache G, et al. Randomized controlled trial (RCT) of vitamin D  
14 supplementation in pregnancy in a population with endemic vitamin D deficiency. *J Clin*  
15 *Endocrinol Metab* 2013; 98:2337-2346.
- 16 41. Hossain N, Kanani FH, Ramzan S, et al. Obstetric and neonatal outcomes of maternal vitamin  
17 D supplementation: results of an open-label, randomized controlled trial of antenatal vitamin  
18 D supplementation in Pakistani women. *J Clin Endocrinol Metab* 2014; 99:2448-2455.
- 19 42. Perez-Lopez FR, Pasupuleti V, Mezones-Holguin E, et al. Effect of vitamin D supplementation  
20 during pregnancy on maternal and neonatal outcomes: a systematic review and  
21 meta-analysis of randomized controlled trials. *Fertil Steril* 2015; 103:1278-1288 e1274  
22  
23  
24  
25  
26  
27  
28  
29  
30  
31  
32  
33  
34  
35  
36  
37  
38  
39  
40  
41  
42  
43  
44  
45  
46  
47  
48  
49  
50  
51  
52  
53  
54  
55  
56  
57  
58  
59  
60

**Table 1.** Characteristics of the included studies in the present meta-analysis

| Author                  | Region      | Year | Age at baseline | Pre-pregnancy BMI (kg/m <sup>2</sup> ) | Gestational week of blood sampling | Measurement of vitamin D | NOS Score | Sample size |
|-------------------------|-------------|------|-----------------|----------------------------------------|------------------------------------|--------------------------|-----------|-------------|
| Leffelaar <sup>14</sup> | Netherlands | 2010 | NA              | NA                                     | 12-14 weeks                        | enzyme immunoassay       | 8         | 3730        |
| Burris <sup>23</sup>    | USA         | 2012 | 32.5            | 24.8                                   | 26-28 weeks                        | CLIA and RIA             | 7         | 1133        |
| Zhou <sup>24</sup>      | China       | 2014 | 29.5            | 20.3                                   | 16-20 weeks                        | ECLIA                    | 8         | 1923        |
| Choi <sup>25</sup>      | Korea       | 2015 | 32.0            | 20.2                                   | first or second or third trimester | LC-MS/MS                 | 6         | 220         |
| Ong <sup>17</sup>       | Singapore   | 2016 | 30.5            | 26.1                                   | 26-28 weeks                        | LC-MS/MS                 | 8         | 910         |
| Kiely <sup>26</sup>     | Ireland     | 2016 | 30.5            | 24.9                                   | 14-16 weeks                        | LC-MS/MS                 | 6         | 1768        |
| Scholl <sup>27</sup>    | USA         | 2014 | 22.8            | 26                                     | 13.8±5.6 weeks                     | RIA                      | 8         | 1045        |
| Chen <sup>4</sup>       | China       | 2015 | 27.5            | NA                                     | first or second or third trimester | RIA                      | 6         | 3658        |
| Boyle <sup>28</sup>     | New Zealand | 2016 | 30.3            | 24.8                                   | 15 weeks                           | LC-MS/MS                 | 7         | 2065        |
| Berg <sup>29</sup>      | Netherlands | 2013 | NA              | NA                                     | 12.9 weeks                         | enzyme immunoassay       | 7         | 2274        |
| Gerand <sup>15</sup>    | USA         | 2013 | NA              | 22.3                                   | 20.6 weeks                         | LC-MS/MS                 | 6         | 2146        |
| Miliku <sup>30</sup>    | Netherlands | 2016 | 29.7            | 23.7                                   | 20.3 weeks                         | LC-MS/MS                 | 7         | 7176        |
| Nobles <sup>16</sup>    | USA         | 2015 | NA              | >25                                    | 15.2±4.7 weeks                     | LC-MS/MS                 | 8         | 237         |

CLIA: chemiluminescence immunoassay; RIA: radioimmunoassay; ECLIA: electrochemiluminescence immunoassay; LC-MS/MS: liquid chromatography-tandem mass spectrometry; NA: not available.



1  
2  
3  
4  
5  
6  
7  
8  
9  
10  
11  
12  
13  
14  
15  
16  
17  
18  
19  
20  
21  
22  
23  
24  
25  
26  
27  
28  
29  
30  
31  
32  
33  
34  
35  
36  
37  
38  
39  
40  
41  
42  
43  
44  
45  
46  
47  
48  
49

**Table 2.** Subgroup analysis of the association between maternal Vitamin D deficiency and SGA

| Stratification group            | N  | P Value for OR | OR (95% CI)          | Heterogeneity test |         |
|---------------------------------|----|----------------|----------------------|--------------------|---------|
|                                 |    |                |                      | I-square (%)       | P Value |
| Ethnicity                       |    |                |                      |                    |         |
| Caucasian                       | 9  | 0.001          | 1.433 (1.150, 1.785) | 57.2               | 0.016   |
| Asian                           | 4  | 0.475          | 1.655 (0.416, 6.587) | 92.3               | <0.001  |
| Study quality (NOS)             |    |                |                      |                    |         |
| High                            | 9  | <0.001         | 1.542 (1.230, 1.934) | 36.0               | 0.130   |
| Low                             | 4  | 0.440          | 1.441 (0.570, 3.641) | 95.2               | <0.001  |
| Gestation of blood sampling     |    |                |                      |                    |         |
| first trimester                 | 6  | 0.058          | 1.320 (0.991,1.760)  | 59.5               | 0.030   |
| second trimester                | 5  | 0.015          | 1.544 (1.088, 2.192) | 48.2               | 0.102   |
| Cut-off values                  |    |                |                      |                    |         |
| <10 ng/ml                       | 2  | 0.001          | 2.219 (1.480, 3.325) | 0                  | 0.446   |
| <15 ng/ml                       | 2  | 0.029          | 1.532(1.046, 2.246)  | 73.2               | 0.054   |
| <20 ng/ml                       | 9  | 0.201          | 1.424 (0.828, 2.449) | 88.2               | <0.001  |
| Sample size                     |    |                |                      |                    |         |
| > 1000                          | 10 | 0.003          | 1.745(1.201, 2.536)  | 86.7               | <0.001  |
| < 1000                          | 3  | 0.946          | 0.975(0.476, 1.999)  | 45.5               | 0.160   |
| Adjust for critical confounders |    |                |                      |                    |         |
| yes                             | 10 | 0.018          | 1.681 (1.094, 2.584) | 86.3               | < 0.001 |
| no                              | 3  | 0.051          | 1.224 (0.999, 1.500) | 0                  | 0.395   |

**Table 3.** Sensitivity analyses of the association between vitamin D deficiency and SGA

| Study omitted           | OR (95% CI)          | P value | I-square (%) | P value |
|-------------------------|----------------------|---------|--------------|---------|
| Leffelaar <sup>14</sup> | 1.543 (1.058, 2.250) | 0.024   | 85.1         | < 0.001 |
| Burris <sup>23</sup>    | 1.511 (1.068, 2.138) | 0.020   | 85.1         | < 0.001 |
| Zhou <sup>24</sup>      | 1.557 (1.105, 2.195) | 0.011   | 85.4         | < 0.001 |
| Choi <sup>25</sup>      | 1.679 (1.196, 2.357) | 0.003   | 84.4         | < 0.001 |
| Ong <sup>17</sup>       | 1.638 (1.147, 2.339) | 0.007   | 85.0         | < 0.001 |
| Kiely <sup>26</sup>     | 1.672 (1.175, 2.377) | 0.004   | 83.3         | < 0.001 |
| Scholl <sup>27</sup>    | 1.654 (1.159, 2.361) | 0.006   | 84.5         | < 0.001 |
| Chen <sup>4</sup>       | 1.354 (1.094, 1.676) | 0.005   | 54.5         | 0.012   |
| Boyle <sup>28</sup>     | 1.601 (1.102, 2.324) | 0.013   | 85.3         | < 0.001 |
| Berg <sup>29</sup>      | 1.574 (1.086, 2.281) | 0.017   | 85.4         | < 0.001 |
| Gerand <sup>15</sup>    | 1.608 (1.084, 2.387) | 0.018   | 84.7         | < 0.001 |
| Miliku <sup>30</sup>    | 1.532 (1.063, 2.207) | 0.022   | 85.1         | < 0.001 |

1  
2  
3  
4  
5  
6  
7  
8  
9  
10  
11  
12  
13  
14  
15  
16  
17  
18  
19  
20  
21  
22  
23  
24  
25  
26  
27  
28  
29  
30  
31  
32  
33  
34  
35  
36  
37  
38  
39  
40  
41  
42  
43  
44  
45  
46  
47  
48  
49

---

|                      |                      |       |      |         |
|----------------------|----------------------|-------|------|---------|
| Nobles <sup>16</sup> | 1.550 (1.094, 2.196) | 0.014 | 85.4 | < 0.001 |
|----------------------|----------------------|-------|------|---------|

---

For peer review only

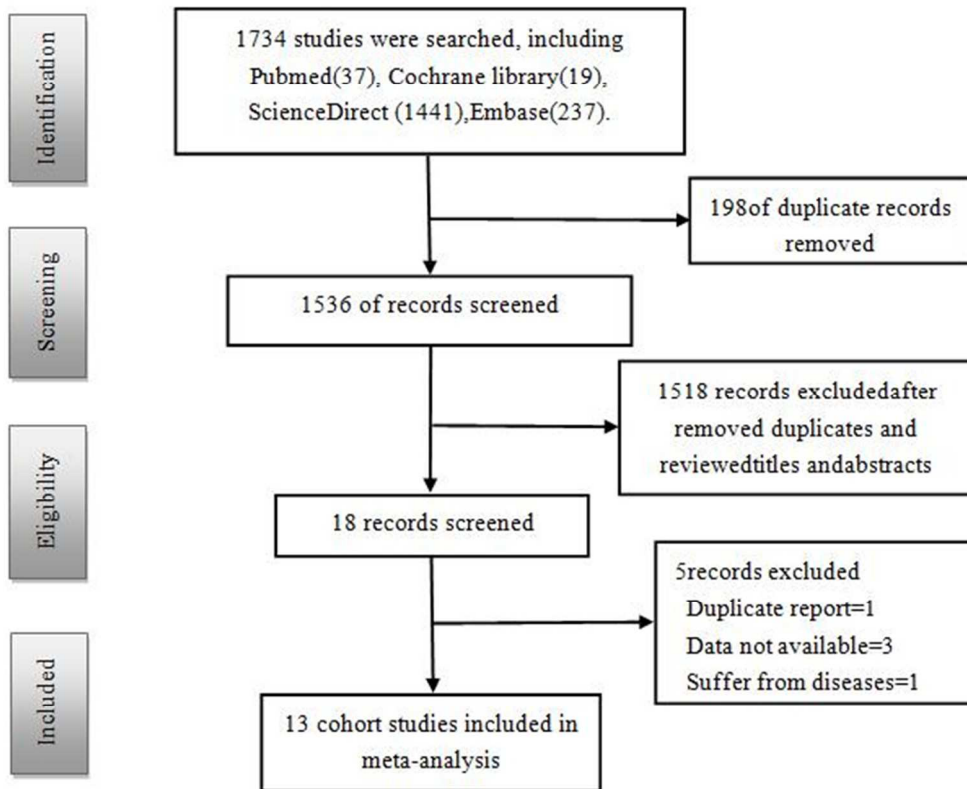

Figure 1. Flowchart of the literature search and trial selection process

162x134mm (96 x 96 DPI)

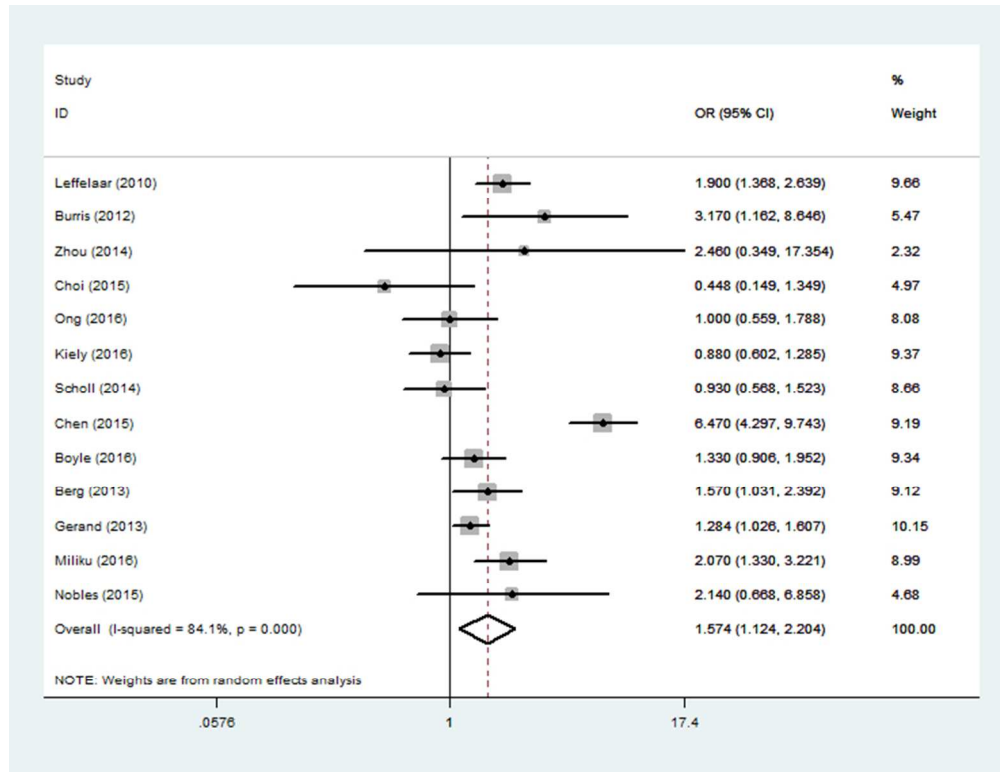

Figure 2. Forest plots of summary crude odds ratios of the association between vitamin D deficiency and SGA

259x200mm (72 x 72 DPI)

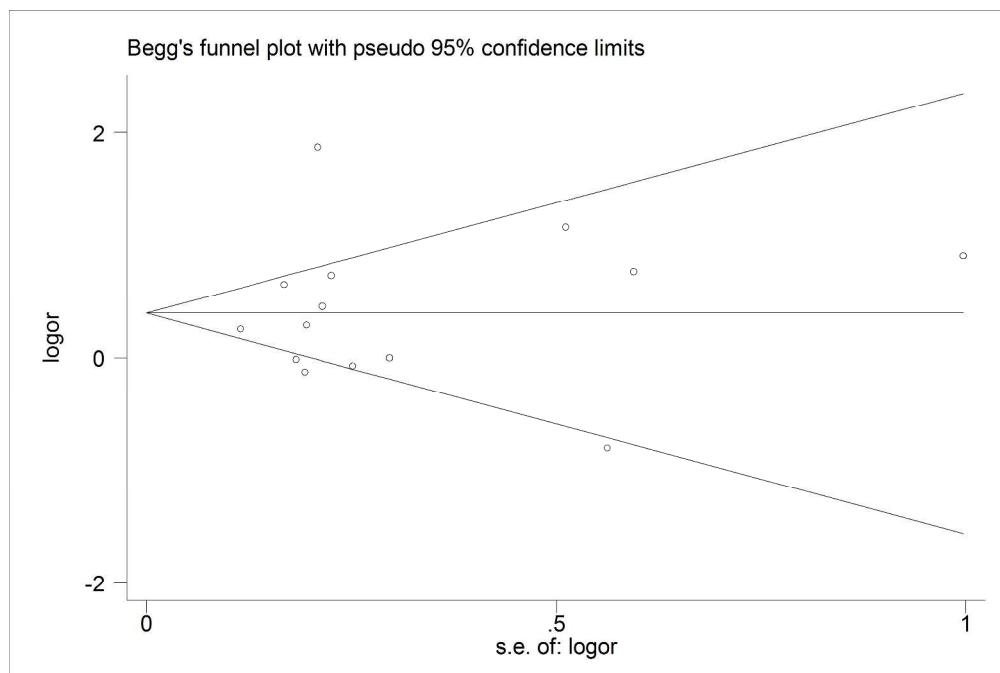

Figure 3. Funnel plot for small for gestational age. Log OR of the individual studies plotted against the standard error of log OR.

635x423mm (144 x 144 DPI)

View only

1  
2  
3  
4  
5  
6  
7  
8  
9  
10  
11  
12  
13  
14  
15  
16  
17  
18  
19  
20  
21  
22  
23  
24  
25  
26  
27  
28  
29  
30  
31  
32  
33  
34  
35  
36  
37  
38  
39  
40  
41  
42  
43  
44  
45  
46  
47  
48  
49  
50  
51  
52  
53  
54  
55  
56  
57  
58  
59  
60

| Section and topic         | Item No | Checklist item                                                                                                                                                                                                                | Reported on page No |
|---------------------------|---------|-------------------------------------------------------------------------------------------------------------------------------------------------------------------------------------------------------------------------------|---------------------|
| Title:                    |         |                                                                                                                                                                                                                               |                     |
| Identification            | 1a      | Identify the report as a protocol of a systematic review                                                                                                                                                                      | 1                   |
| Update                    | 1b      | If the protocol is for an update of a previous systematic review, identify as such                                                                                                                                            |                     |
| Registration              | 2       | If registered, provide the name of the registry (such as PROSPERO) and registration number                                                                                                                                    |                     |
| Authors:                  |         |                                                                                                                                                                                                                               |                     |
| Contact                   | 3a      | Provide name, institutional affiliation, e-mail address of all protocol authors; provide physical mailing address of corresponding author                                                                                     | 1                   |
| Contributions             | 3b      | Describe contributions of protocol authors and identify the guarantor of the review                                                                                                                                           | 10                  |
| Amendments                | 4       | If the protocol represents an amendment of a previously completed or published protocol, identify as such and list changes; otherwise, state plan for documenting important protocol amendments                               |                     |
| Support:                  |         |                                                                                                                                                                                                                               |                     |
| Sources                   | 5a      | Indicate sources of financial or other support for the review                                                                                                                                                                 | 10                  |
| Sponsor                   | 5b      | Provide name for the review funder and/or sponsor                                                                                                                                                                             |                     |
| Role of sponsor or funder | 5c      | Describe roles of funder(s), sponsor(s), and/or institution(s), if any, in developing the protocol                                                                                                                            |                     |
| <b>INTRODUCTION</b>       |         |                                                                                                                                                                                                                               |                     |
| Rationale                 | 6       | Describe the rationale for the review in the context of what is already known                                                                                                                                                 | 3                   |
| Objectives                | 7       | Provide an explicit statement of the question(s) the review will address with reference to participants, interventions, comparators, and outcomes (PICO)                                                                      | 3                   |
| <b>METHODS</b>            |         |                                                                                                                                                                                                                               |                     |
| Eligibility criteria      | 8       | Specify the study characteristics (such as PICO, study design, setting, time frame) and report characteristics (such as years considered, language, publication status) to be used as criteria for eligibility for the review | 4                   |
| Information sources       | 9       | Describe all intended information sources (such as electronic databases, contact with study authors, trial registers or other grey literature sources) with planned dates of coverage                                         | 3                   |
| Search strategy           | 10      | Present draft of search strategy to be used for at least one electronic database, including planned limits, such that it could be repeated                                                                                    | 3                   |

|                                    |     |                                                                                                                                                                                                                                                  |           |
|------------------------------------|-----|--------------------------------------------------------------------------------------------------------------------------------------------------------------------------------------------------------------------------------------------------|-----------|
| Study records:                     |     |                                                                                                                                                                                                                                                  |           |
| Data management                    | 11a | Describe the mechanism(s) that will be used to manage records and data throughout the review                                                                                                                                                     | 8         |
| Selection process                  | 11b | State the process that will be used for selecting studies (such as two independent reviewers) through each phase of the review (that is, screening, eligibility and inclusion in meta-analysis)                                                  | 4,18      |
| Data collection process            | 11c | Describe planned method of extracting data from reports (such as piloting forms, done independently, in duplicate), any processes for obtaining and confirming data from investigators                                                           | 4,18      |
| Data items                         | 12  | List and define all variables for which data will be sought (such as PICO items, funding sources), any pre-planned data assumptions and simplifications                                                                                          | 14        |
| Outcomes and prioritization        | 13  | List and define all outcomes for which data will be sought, including prioritization of main and additional outcomes, with rationale                                                                                                             | 14-16     |
| Risk of bias in individual studies | 14  | Describe anticipated methods for assessing risk of bias of individual studies, including whether this will be done at the outcome or study level, or both; state how this information will be used in data synthesis                             | 16        |
| Data synthesis                     | 15a | Describe criteria under which study data will be quantitatively synthesised                                                                                                                                                                      | 5         |
|                                    | 15b | If data are appropriate for quantitative synthesis, describe planned summary measures, methods of handling data and methods of combining data from studies, including any planned exploration of consistency (such as $I^2$ , Kendall's $\tau$ ) | 5         |
|                                    | 15c | Describe any proposed additional analyses (such as sensitivity or subgroup analyses, meta-regression)                                                                                                                                            | 15        |
|                                    | 15d | If quantitative synthesis is not appropriate, describe the type of summary planned                                                                                                                                                               | 5         |
| Meta-bias(es)                      | 16  | Specify any planned assessment of meta-bias(es) (such as publication bias across studies, selective reporting within studies)                                                                                                                    | 7         |
| Confidence in cumulative evidence  | 17  | Describe how the strength of the body of evidence will be assessed (such as GRADE)                                                                                                                                                               | 7,9,16,20 |



# BMJ Open

## Association between maternal vitamin D deficiency and small for gestational age: evidence from a meta-analysis of prospective cohort studies

|                                 |                                                                                                                                                                                                                                                                                                     |
|---------------------------------|-----------------------------------------------------------------------------------------------------------------------------------------------------------------------------------------------------------------------------------------------------------------------------------------------------|
| Journal:                        | <i>BMJ Open</i>                                                                                                                                                                                                                                                                                     |
| Manuscript ID                   | bmjopen-2017-016404.R1                                                                                                                                                                                                                                                                              |
| Article Type:                   | Research                                                                                                                                                                                                                                                                                            |
| Date Submitted by the Author:   | 02-May-2017                                                                                                                                                                                                                                                                                         |
| Complete List of Authors:       | Chen, Yao; Anhui Medical University, School of Public Health<br>Zhu, Beibei; Anhui Medical University, School of Public Health<br>Wu, Xiaoyan<br>Li, Si; Anhui Medical University, School of Public Health<br>Tao, Fangbiao; Anhui Provincial Key Laboratory of Population Health and Aristogenics, |
| <b>Primary Subject Heading</b>: | Public health                                                                                                                                                                                                                                                                                       |
| Secondary Subject Heading:      | Nutrition and metabolism                                                                                                                                                                                                                                                                            |
| Keywords:                       | vitamin D, small for gestational age, cohort study, meta-analysis                                                                                                                                                                                                                                   |
|                                 |                                                                                                                                                                                                                                                                                                     |

SCHOLARONE™  
Manuscripts

1  
2  
3 **Association between maternal vitamin D deficiency and small for gestational age:**  
4 **evidence from a meta-analysis of prospective cohort studies**  
5  
6

7 Yao Chen<sup>1</sup>, Beibei Zhu<sup>1,2</sup>, Xiaoyan Wu<sup>1,2</sup>, Si Li<sup>3</sup>, Fangbiao Tao<sup>1,2</sup>  
8

9 <sup>1</sup>Department of Maternal, Child and Adolescent Health, School of Public Health,  
10 Anhui Medical University, Hefei, China  
11

12 <sup>2</sup>Anhui Provincial Key Laboratory of Population Health and Aristogenics, Hefei,  
13 China  
14

15 <sup>3</sup>Department of Epidemiology and Biostatistics, School of Public Health, Anhui  
16 Medical University, Hefei, China.  
17  
18

19  
20 **Correspondence to:** Fangbiao Tao, Department of Maternal, Child and Adolescent  
21 Health, School of Public Health, Anhui Medical University, 81Meishan Road, Hefei,  
22 Anhui, 230032, P.R.China. Tel.: +86 551 65161169.  
23  
24

25 Email: taofangbiao@126.com  
26  
27  
28  
29  
30  
31  
32  
33  
34  
35  
36  
37  
38  
39  
40  
41  
42  
43  
44  
45  
46  
47  
48  
49  
50  
51  
52  
53  
54  
55  
56  
57  
58  
59  
60

**ABSTRACT**

**Objective:** To estimate whether maternal vitamin D deficiency during pregnancy is associated with small for gestational age (SGA).

**Methods:** A comprehensive literature search of PubMed, Cochrane Library, EMBASE and Elsevier ScienceDirect library was conducted to identify relevant articles of prospective cohort studies in English, with the last report up to February 2017. Pooled odds ratio (*OR*) and corresponding 95% confidence interval (*95% CI*) were used to evaluate the correlation in random-effects model.

**Results:** Totally 13 cohort studies were included in this meta-analysis containing 28285 individuals from 7 countries. Pooled overall *ORs* for babies with SGA were 1.588 (*95% CI* 1.138 to 2.216;  $P < 0.01$ ) for women with vitamin D deficiency. In addition, the prevalence of vitamin D deficiency during pregnancy varied from 13.2% to 77.3%. Subgroup analyses showed that there were no significant differences in the association between vitamin D deficiency and SGA based on study quality, gestation of blood sampling, cut-off values, sample size, adjust for critical confounders and measurement of vitamin D.

**Conclusion:** The current meta-analysis suggests that vitamin D deficiency is associated with increased risk of SGA.

**Keywords:** vitamin D; small for gestational age; cohort study; meta-analysis.

**Strengths and limitations of this study:** 1) To our knowledge, this was the first systemic review only included prospective cohort studies evaluating the association between vitamin D and SGA. 2) Subgroups analysis of this study presented more thorough understanding of current evidence. 3) Quality of each cohort study, heterogeneity test, sensitivity analysis and publication bias were conducted. 4) Different definition of vitamin D deficiency, insufficiency or sufficiency might have influenced the result. 5) Substantial heterogeneity existed among several outcomes.

## INTRODUCTION

Vitamin D is fat-soluble and a steroid hormone recognized for its major role in calcium metabolism and bone health.<sup>1</sup> Vitamin D deficiency or insufficiency has become a global public health issue,<sup>2</sup> especially for pregnant women, among whom the highest deficiency rate is up to 84% according to a multiethnic population survey in Norway.<sup>3</sup> Several large population size studies have depicted the associations of maternal vitamin D deficiency with various adverse maternal and fetal outcomes<sup>4-6</sup> including SGA.

SGA are defined as smaller in size for their own gestational age, most commonly recognized as a weight below the 10th percentile for corresponding gestational age.<sup>7,8</sup> The incidence of SGA was 9.7% worldwide<sup>9</sup> with a growth tendency. Infants born to SGA have much higher neonatal morbidity and mortality.<sup>10</sup> Katz J et al.<sup>11</sup> have showed that pooled RRs for infants who were SGA were 1.83 for neonatal mortality and 1.90 for post-neonatal morbidity. In addition, it might be strongly related to adverse health outcomes in adult life, such as neurocognitive impairment, poor school performance and short stature, as well as increased the risk of diabetes,<sup>12</sup> cardiovascular disease<sup>13</sup> and kidney disease.<sup>14</sup>

Although many studies have focused on the association between maternal vitamin D status and SGA, the results of these studies remain inconsistent. A prospective cohort study in Netherlands examined vitamin D concentrations in 3,730 pregnant women at 12-14 weeks of gestation shows that infants born to mothers with vitamin D deficiency had an increased risk of SGA compared with adequate vitamin D levels.<sup>15</sup> Subsequently, Gernand et al.<sup>16</sup> reported that the vitamin D levels below 15 ng/ml group had significantly higher risk of SGA. However, some other studies demonstrated no association between vitamin D status and SGA.<sup>17,18</sup>

Given the blurred picture of this issue, we attempted to summarize current best quality of evidences and conduct a meta-analysis of prospective cohort studies to answer whether vitamin D deficiency in pregnant women is associated with SGA.

## MATERIALS AND METHODS

### Data sources, search strategy, and selection criteria

A systematic literature search was performed using the PubMed, Elsevier ScienceDirect, Cochrane Library and Embase databases to find out all relevant publications until February 2017. No restrictions were placed on maternal age, study design or language. The following keywords were used: 'vitamin D' or 'cholecalciferol' or '25-hydroxyvitamin D' or '25(OH)D' in combined with 'SGA' or 'small for gestational age' or 'small-for-gestation-age' or 'small size for gestational age' (PubMed, for example, specific search strategy see supplementary box S1)

### Selection Criteria

We first screened the titles and abstracts of all the articles to identify the possible eligible studies, and then read the full articles to include eligible studies. The studies fit into the meta-analysis were selected according to the following inclusion criteria: 1) the population of study was maternal without pre-chronic disease; 2) the study included maternal with singleton gestation; 3) the outcome was SGA and the control group included maternal without SGA, the exposure was 'vitamin D deficiency' [25(OH)D<20ng/ml]; 4) studies with data in the form of effect estimate [odds ratio (*OR*) or risk ratio (*RR*)] and corresponding 95% confidence interval (*CI*) or reported data to calculate them; 5) maternal blood samples were taken for assessing 25(OH)D during pregnancy; 6) the study design was cohort studies (to provide more reliable evidence, we only included prospective cohort studies, which have more advantages than case-control studies); 7) published in English.

### Data extraction and quality evaluation

Two investigators respectively reviewed all abstracts for related studies, and read full texts of eligible literatures. We extracted data using a standardized form and assessed study quality. Disagreements were resolved by discussion and consulting a third

investigator. The following data were collected from each study: 1) publication information: the first author name, publish year; 2) population's characteristics: country of origin, the average age and pre-pregnancy body mass index (BMI), ethnicity, education status, current gestational week of blood sampling, gestation age of infant at birth and season of blood sample; 3) methods: assay methods of serum/plasma vitamin D levels measured and sample size; 4) latitude and the time of year data collected; 5) *OR* as well as their 95% *CI* for each study. If available, the *ORs* with 95% *CI* were collected from the original article. If original important data were unavailable, the *ORs* with 95% *CI* were calculated by using data from observed articles to construct 2×2 tables of low vitamin D status versus the presence or absence of SGA. Otherwise, we contacted the corresponding author by e-mail to obtain further details. Finally, we assessed the eligible studies based on Newcastle-Ottawa Scale (NOS) system. This scale ranging from 0 to 9 contains 9 items (1 point for each) in 3 parts: selection (4 items), comparability (2 items) and exposure or outcomes (3 items). Scores ranging from 0-3 were deemed to poor quality, scores ranging from 4-6 were deemed to moderate quality and scores surpassing 7 were deemed to high quality.

### Statistical Analysis

The data extracted from eligible studies were in the form of effect estimate (*OR* or *RR*) and corresponding 95% *CI*. Due to the low level of the morbidity of SGA, the value of *OR* was approximately equal to *RR*.<sup>19</sup> Meta-analysis was performed using STATA package version 12.0 (Stata Corporation, College Station, TX, USA). The *ORs* and 95% *CI*s for normal vitamin D levels versus deficient vitamin D levels from each study were combined to calculate the estimated pooled *OR*, 95% *CI* and *P* value. *Q*-statistic test and the I-square ( $I^2$ ) test were used to estimate the heterogeneity among different studies.<sup>20</sup> The random-effects model was usually a more plausible when studies were gathered from the published literature.<sup>21</sup> Therefore, the random effects model was used for this meta-analysis. To explore the sources of heterogeneity and the various

1  
2  
3 results of pre-specified subgroups, subgroup analysis was carried out based on status  
4 of cut-off values, study quality (NOS scores), adjustment of critical confounders,  
5 sample size, measurement of vitamin D and current gestation of blood sampling. A  
6 sensitivity analysis was conducted to determine the stability and reliability of the  
7 results by leave one out at a time and checking the consistency of the overall effect  
8 estimate. Funnel plots were used to qualitatively assess the publication bias, and  
9 Egger's and Begg's tests were also used to quantitatively assess publication bias.<sup>22 23</sup>  
10  
11  
12  
13  
14  
15  
16  
17

## 18 RESULTS

### 19 Description of included studies

20 A total of 1734 literatures were identified for initial review using search strategies as  
21 described. After removing duplicates, 1 536 studies remained. We screened the titles  
22 and abstracts of these studies, excluded 1 518 records according to the inclusion and  
23 exclusion. Then the remaining 18 full-text articles were assessed for eligibility. Finally,  
24 13 cohort studies<sup>4 15-18 24-31</sup> were included in the meta-analysis (Figure 1), including  
25 28285 pregnant women.  
26  
27  
28  
29  
30  
31  
32

33 Characteristics and methodological quality of 13 studies are presented in Table 1  
34 and supplementary Table S1: These studies were published from 2010 to 2016, four of  
35 the studies were conducted in USA, three in Netherlands, two in China and one each  
36 in Korea, Singapore, Ireland and New Zealand. Of the 13 studies, the average age of  
37 the pregnant women was < 30 years old (4 studies) and >30 years old (5 studies), the  
38 average pre-pregnancy BMI of 7 studies were below 25 kg/m<sup>2</sup> and 3 studies were  
39 above 25 kg/m<sup>2</sup>. Nevertheless, 10 studies have adjusted for confounders and 3 studies  
40 have not. 5 studies adopted blood during first trimester, 5 studies were second  
41 trimester, 3 studies were mixed with first, second or third trimester. Furthermore, 5  
42 different assay methods were used to measure vitamin D levels of pregnant women  
43 and 2 different criteria were used for diagnosis of SGA (with the birthweight in the  
44 lowest 10<sup>th</sup> percentile or 15<sup>th</sup> percentile of the reference population). In addition, the  
45 prevalence of maternal vitamin D deficiency varied from 13.2% to 77.3% (showed in  
46  
47  
48  
49  
50  
51  
52  
53  
54  
55  
56  
57  
58  
59  
60

1  
2  
3 supplementary Table S1). Finally, the degrees of NOS score were presented as high  
4 levels (9 studies) and low levels (4 studies).  
5  
6  
7

### 8 9 **Meta-analysis results**

10 The overall results showed that maternal vitamin D deficiency during pregnancy was  
11 significantly associated with an increased risk of SGA (pooled  $OR=1.588$ ; 95%  $CI$   
12 1.138 to 2.216;  $P<0.01$ ) in the random-effects model and the forest plot showed the  
13 details (Figure 2).  
14  
15  
16  
17  
18  
19

### 20 **Subgroup analysis**

21 Due to the existence of heterogeneity ( $I^2=84.2%$ ;  $P<0.001$ ), subgroup analysis was  
22 carried out to explore the possible sources of heterogeneity in the meta-analysis  
23 (Table 2). The subgroups were based on status of cut-off values of vitamin D levels,  
24 measurement of vitamin D, sample size, study quality (NOS score levels), whether  
25 adjusted for critical confounders and gestational week of blood sampling. In subgroup  
26 analyses, the confidence intervals were overlapped for each subgroup, which showed  
27 no statistically significant difference in the effect estimates. Thus, there were no  
28 differences in the association between vitamin D deficiency with SGA based on study  
29 quality, gestation of blood sampling, cut-off values, sample size, adjust for critical  
30 confounders and measurement of vitamin D (Table 2). However, we did not conduct  
31 subgroup analyses of ethnicity, pre-pregnancy BMI, gestational age of infant at birth  
32 and season of blood sample due to insufficient/ unspecific data in some studies.  
33  
34  
35  
36  
37  
38  
39  
40  
41  
42  
43  
44  
45  
46

### 47 **Sensitivity analysis and publication bias**

48 To evaluate the stability of our results, sensitivity analysis was carried out. Chen's  
49 study was responsible for most of the heterogeneity in this meta-analysis. Low  
50 heterogeneity was observed among the remaining studies ( $I^2=55.4%$ ,  $P=0.010$ ) and  
51 pooled  $OR$  was 1.336 (95%  $CI$  1.103 to 1.692) after excluding Chen's study<sup>4</sup>.  
52 Furthermore, there were no obvious changes in the pooled  $ORs$  as a result of the  
53  
54  
55  
56  
57  
58  
59  
60



1  
2  
3  
4  
5  
6  
7  
8  
9  
10  
11  
12  
13  
14  
15  
16  
17  
18  
19  
20  
21  
22  
23  
24  
25  
26  
27  
28  
29  
30  
31  
32  
33  
34  
35  
36  
37  
38  
39  
40  
41  
42  
43  
44  
45  
46  
47  
48  
49  
50  
51  
52  
53  
54  
55  
56  
57  
58  
59  
60

exclusion of any other single study. The pooled *ORs* ranged from 1.366 (95% *CI* 1.103 to 1.692) to 1.693 (95% *CI* 1.211 to 2.366), and each was statistically significant (Table 3). There was also no publication bias after carrying out Begg's test ( $P=0.669$ ) and Egger's regression test ( $P=0.815$ ), the funnel plot showed the details (Figure 3).

## DISCUSSION

The prevalence of vitamin D deficiency during pregnancy and its association with risk of SGA caught increasing attentions. Current meta-analysis of prospective cohort studies suggested that vitamin D deficiency is significantly associated with an increased risk of SGA. No publication bias was detected and sensitive analysis showed no single study dramatically influences the results, which indicated that the results of our meta-analysis were stable and reliable.

Our study was in line with several previous studies. A previous meta-analysis showed that low maternal vitamin D levels during pregnancy may be associated with an increased risk of SGA, gestational diabetes mellitus, preterm birth.<sup>5</sup> Similarly, another vital meta-analysis also suggested that vitamin D insufficiency was associated with an increased risk of SGA, preeclampsia, and bacterial vaginosis.<sup>6</sup> However, those studies included both case-control and prospective cohort studies and did not include latest published cohort studies, and did not evaluate the association in specific subgroup analysis. Moreover, the cut-off values for the vitamin D status differed between different studies. Thus, we conducted this meta-analysis to provide stronger evidence for the association between vitamin D and SGA.

Heterogeneity test (the Coherence *Q* test) showed significant heterogeneity existed among studies. We explored the potential influential factors for the results by performing a subgroup analysis. Although the results of subgroup analyses showed that there were no significant differences in the association between vitamin D deficiency with SGA based on study quality, gestation of blood sampling, cut-off values, sample size, adjust for critical confounders and measurement of vitamin D,

1  
2  
3 there may be other potential factors contributing to the heterogeneity in our  
4 meta-analysis. The different for ethnicity of the maternal, season of blood sample,  
5 sunlight exposure and diet during pregnancy are confounding factors for the  
6 association between vitamin D deficiency and SGA. Sensitivity analysis showed that  
7 exclusion of any single study did not materially alter the overall combined effect,  
8 however, our sensitivity suggested that Chen's study probably contributed to the  
9 heterogeneity. Therefore, we should look at the results of this meta-analysis  
10 objectively.  
11

12  
13 The underlying mechanism of vitamin D deficiency increases risk of SGA is not  
14 entirely clear but might be explained by the inflammatory response. Vitamin D  
15 deficiency can increase the levels of proinflammatory cytokines, leading to oxidative  
16 stress. Lower 25(OH)D status is associated with increased vascular endothelial cell  
17 expression of nuclear factor  $\kappa$ B (NF $\kappa$ B) and interleukin 6 (IL-6), and with decreased  
18 of vitamin D receptor (VDR) and 1- $\alpha$  hydroxylase.<sup>32</sup> A study reported that the levels  
19 of pro-inflammatory cytokines in cord blood of SGA were significantly higher than  
20 that in normal-born infants.<sup>33</sup> Mullins et al.<sup>34</sup> showed that the offspring of pregnant  
21 women of SGA contained higher tumor necrosis factor (TNF- $\alpha$ ) than normal offspring  
22 of pregnant women, and as an important inflammatory factor, TNF- $\alpha$  inhibited  
23 placental hormone synthesis and stimulated calcitriol catabolism by regulating  
24 enzymes.<sup>35</sup> Vitamin D may also play an important role in innate and adaptive  
25 immunity by inhibiting the pathway of decidual NF $\kappa$ B to reduce the inflammatory  
26 response, since NF $\kappa$ B is a main transcription factor of inflammatory mediators.<sup>36</sup>  
27  
28  
29  
30  
31  
32  
33  
34  
35  
36  
37  
38  
39  
40  
41  
42  
43  
44

45 Maternal vitamin D deficiency is prevalent, the extent to which can be influenced  
46 by many variables including ethnicity, region, skin pigmentation, sun exposure,  
47 season, age, vitamin D supplementation and others.<sup>37</sup> The American Association of  
48 Endocrinology recommended that pregnant women require at least 600 *IU/d* of  
49 vitamin D and confirmed that at least 1500-2000 *IU/d* of vitamin D may be needed to  
50 keep a blood level of vitamin D above 30 ng/ml.<sup>38</sup> However, the recommendations of  
51 pregnant women vitamin D supplementation is scanty. At present, vitamin D  
52  
53  
54  
55  
56  
57  
58  
59  
60

1  
2  
3 supplementation during pregnancy has been suggested as an intervention to prevent  
4 adverse pregnancy outcomes.<sup>39</sup> A randomized controlled trial reported that maternal  
5 vitamin D supplementation of 2000 and 4000 IU/d appeared safe during pregnancy,  
6 and the most effective in optimizing serum vitamin D concentrations in mothers and  
7 their infants was 4000 IU/d,<sup>40</sup> this result was consistent with another randomized  
8 controlled trial in Pakistan.<sup>41</sup> Low vitamin D levels during pregnancy could increase  
9 the risk of SGA, however, vitamin D supplementation did not significantly reduce the  
10 risk of SGA [(OR=0.78, 95% CI 0.50 to 1.21)<sup>42</sup> or (OR=0.67, 95% CI 0.40 to 1.11)<sup>43</sup>].  
11 In addition, it was hard to make final conclusions on need for supplementation of  
12 vitamin D during pregnancy.<sup>44</sup> Therefore, we need larger randomized controlled trials  
13 to assess the value of these interventions in the future, which has a significant impact  
14 on the guidance of the perinatal period care.

15  
16  
17  
18  
19  
20  
21  
22  
23  
24  
25  
26 Our study has several strengths. Firstly, to provide more reliable evidence, we  
27 only included prospective cohort studies, which have more advantages than  
28 case-control studies as we all familiar with. Secondly, no publication bias existing,  
29 indicating that the included results may be unbiased and credible. At last, subgroups  
30 analysis of our study presented more thorough understanding of current evidence.  
31 However, several limitations should also be acknowledged. The association between  
32 maternal vitamin D status and SGA risk could be affected by confounding factors  
33 such as pre-pregnancy BMI, age, education, race and exposure sunlight, however, not  
34 all studies are control these confounding factors in our meta-analysis. Then, different  
35 definition of vitamin D deficiency, insufficiency or sufficiency might have influenced  
36 the result. Lastly, pooled data without detail individual information were used to  
37 performed meta-analysis, which restricted us to get more comprehensive results.  
38  
39  
40  
41  
42  
43  
44  
45  
46  
47  
48

## 49 50 51 **CONCLUSIONS**

52 The present study indicates that low vitamin D levels is associated with an increased  
53 risk of SGA. Further confirmation of these findings in larger sample size studies are  
54 required. The role of vitamin D in the pathogenesis of SGA should be emphasized. As  
55  
56  
57  
58  
59  
60

1  
2  
3 well, early screening for vitamin D deficiency among pregnant women may be  
4 necessary.  
5  
6  
7

8  
9 **Contributors** FT contributed to study design; SL, XW and BZ contributed analysis  
10 tools and methods; YC analyzed the data and drafted the manuscript; BZ and FT  
11 revised the manuscript. All authors read and approved the final version of the  
12 manuscript.  
13  
14

15  
16 **Funding** This work is grateful for the financial support offered by the National  
17 Natural Science Foundation of China (81330068, 81573168)  
18  
19

20 **Data sharing statement** No additional data are available  
21

22 **Competing interests** None declared.  
23  
24  
25  
26  
27  
28  
29  
30  
31  
32  
33  
34  
35  
36  
37  
38  
39  
40  
41  
42  
43  
44  
45  
46  
47  
48  
49  
50  
51  
52  
53  
54  
55  
56  
57  
58  
59  
60

## REFERENCES

1. Finberg L. Vitamin D deficiency and rickets. *J Pediatr Endocrinol Metab* 2006; 19:203.
2. Palacios C, Gonzalez L. Is vitamin D deficiency a major global public health problem? *J Steroid Biochem Mol Biol* 2014; 144 Pt A:138-145.
3. Eggemoen AR, Falk RS, Knutsen KV, *et al.* Vitamin D deficiency and supplementation in pregnancy in a multiethnic population-based cohort. *BMC pregnancy and childbirth* 2016; 16:7.
4. Chen YH, Fu L, Hao JH, *et al.* Maternal vitamin D deficiency during pregnancy elevates the risks of small for gestational age and low birth weight infants in Chinese population. *J Clin Endocrinol Metab* 2015; 100:1912-1919.
5. Wei SQ, Qi HP, Luo ZC, *et al.* Maternal vitamin D status and adverse pregnancy outcomes: a systematic review and meta-analysis. *J Matern Fetal Neonatal Med* 2013; 26:889-899.
6. Aghajafari F, Nagulesapillai T, Ronksley PE, *et al.* Association between maternal serum 25-hydroxyvitamin D level and pregnancy and neonatal outcomes: systematic review and meta-analysis of observational studies. *BMJ* 2013; 346:f1169.
7. Mikolajczyk RT, Zhang J, Betran AP, *et al.* A global reference for fetal-weight and birthweight percentiles. *Lancet* 2011; 377:1855-1861.
8. Hoftiezer L, Hukkelhoven CW, Hogeveen M, *et al.* Defining small-for-gestational-age: prescriptive versus descriptive birthweight standards. *Eur J Pediatr* 2016; 175:1047-1057.
9. Ding G, Tian Y, Zhang Y, *et al.* Application of a global reference for fetal-weight and birthweight percentiles in predicting infant mortality. *BJOG* 2013; 120(13):1613-1621.
10. Christian P, Murray-Kolb LE, Tielsch JM, *et al.* Associations between preterm birth, small-for-gestational age, and neonatal morbidity and cognitive function among school-age children in Nepal. *BMC pediatrics* 2014; 14:58.
11. Katz J, Lee AC, Kozuki N, *et al.* Mortality risk in preterm and small-for-gestational-age infants in low-income and middle-income countries: a pooled country analysis. *Lancet* 2013; 382(9890):417-25.
12. de Zegher F, Sebastiani G, Diaz M, *et al.* Body composition and circulating high-molecular-weight adiponectin and IGF-I in infants born small for gestational age: breast-versus formula-feeding. *Diabetes* 2012; 61:1969-1973.
13. Wolfenstetter A, Simonetti GD, Poschl J, *et al.* Altered cardiovascular rhythmicity in children born small for gestational age. *Hypertension* 2012; 60:865-870.
14. Aly H, Davies J, El-Dib M, *et al.* Renal function is impaired in small for gestational age premature infants. *J Matern Fetal Neonatal Med* 2013; 26:388-391.
15. Leffelaar ER, Vrijkotte TG, van Eijsden M. Maternal early pregnancy vitamin D status in relation to fetal and neonatal growth: results of the multi-ethnic Amsterdam Born Children and their Development cohort. *Br J Nutr* 2010; 104:108-117.
16. Gernand AD, Simhan HN, Klebanoff MA, *et al.* Maternal serum 25-hydroxyvitamin D and measures of newborn and placental weight in a U.S. multicenter cohort study. *J Clin Endocrinol Metab* 2013; 98:398-404.
17. Nobles CJ, Markenson G, Chasan-Taber L. Early pregnancy vitamin D status and risk for adverse maternal and infant outcomes in a bi-ethnic cohort: the Behaviors Affecting Baby and You (B.A.B.Y.) Study. *Br J Nutr* 2015; 114:2116-2128.

18. Ong YL, Quah PL, Tint MT, *et al.* The association of maternal vitamin D status with infant birth outcomes, postnatal growth and adiposity in the first 2 years of life in a multi-ethnic Asian population: the Growing Up in Singapore Towards healthy Outcomes (GUSTO) cohort study. *Br J Nutr* 2016; 116:621-631.
19. Gagne JJ, Power MC. Anti-inflammatory drugs and risk of Parkinson disease: a meta-analysis. *Neurology* 2010; 74:995-1002.
20. Takkouche B, Cadarso-Suarez C, Spiegelman D. Evaluation of old and new tests of heterogeneity in epidemiologic meta-analysis. *Am J Epidemiol* 1999; 150:206-215.
21. Borenstein M, Hedges LV, Higgins JP, *et al.* A basic introduction to fixed-effect and random-effects models for meta-analysis. *Res Synth Methods* 2010; 1(2):97-111.22. Egger M, Davey Smith G, Schneider M, *et al.* Bias in meta-analysis detected by a simple, graphical test. *BMJ* 1997; 315:629-634.
23. Begg CB, Mazumdar M. Operating characteristics of a rank correlation test for publication bias. *Biometrics* 1994; 50:1088-1101.
24. Burris HH, Rifas-Shiman SL, Camargo CA, *et al.* Plasma 25-hydroxyvitamin D during pregnancy and small-for-gestational age in black and white infants. *Ann Epidemiol* 2012; 22:581-586.
25. Zhou J, Su L, Liu M, *et al.* Associations between 25-hydroxyvitamin D levels and pregnancy outcomes: a prospective observational study in southern China. *Eur J Clin Nutr* 2014; 68:925-930.
26. Choi R, Kim S, Yoo H, *et al.* High prevalence of vitamin D deficiency in pregnant Korean women: the first trimester and the winter season as risk factors for vitamin D deficiency. *Nutrients* 2015; 7:3427-3448.
27. Kiely ME, Zhang JY, Kinsella M, *et al.* Vitamin D status is associated with uteroplacental dysfunction indicated by pre-eclampsia and small-for-gestational-age birth in a large prospective pregnancy cohort in Ireland with low vitamin D status. *Am J Clin Nutr* 2016; 104:354-361.
28. Scholl TO, Chen X, Stein TP. Maternal calcium metabolic stress and fetal growth. *Am J Clin Nutr* 2014; 99:918-925.
29. Boyle VT, Thorstensen EB, Mourath D, *et al.* The relationship between 25-hydroxyvitamin D concentration in early pregnancy and pregnancy outcomes in a large, prospective cohort. *Br J Nutr* 2016; 116:1409-1415.
30. van den Berg G, van Eijsden M, Vrijkotte TG, *et al.* Suboptimal maternal vitamin D status and low education level as determinants of small-for-gestational-age birth weight. *Eur J Nutr* 2013; 52:273-279.
31. Miliku K, Vinkhuyzen A, Blanken LM, *et al.* Maternal vitamin D concentrations during pregnancy, fetal growth patterns, and risks of adverse birth outcomes. *Am J Clin Nutr* 2016; 103:1514-1522.
32. Jablonski KL, Chonchol M, Pierce GL, *et al.* 25-Hydroxyvitamin D deficiency is associated with inflammation-linked vascular endothelial dysfunction in middle-aged and older adults. *Hypertension* 2011; 57:63-69.
33. Lausten-Thomsen U, Olsen M, Greisen G, *et al.* Inflammatory markers in umbilical cord blood from small-for-gestational-age newborns. *Fetal Pediatr Pathol* 2014; 33:114-118.
34. Mullins E, Prior T, Roberts I, *et al.* Changes in the maternal cytokine profile in pregnancies complicated by fetal growth restriction. *Am J Reprod Immunol* 2012; 68:1-7.

- 1
  - 2
  - 3
  - 4
  - 5
  - 6
  - 7
  - 8
  - 9
  - 10
  - 11
  - 12
  - 13
  - 14
  - 15
  - 16
  - 17
  - 18
  - 19
  - 20
  - 21
  - 22
  - 23
  - 24
  - 25
  - 26
  - 27
  - 28
  - 29
  - 30
  - 31
  - 32
  - 33
  - 34
  - 35
  - 36
  - 37
  - 38
  - 39
  - 40
  - 41
  - 42
  - 43
  - 44
  - 45
  - 46
  - 47
  - 48
  - 49
  - 50
  - 51
  - 52
  - 53
  - 54
  - 55
  - 56
  - 57
  - 58
  - 59
  - 60
35. Diaz L, Noyola-Martinez N, Barrera D, *et al.* Calcitriol inhibits TNF-alpha-induced inflammatory cytokines in human trophoblasts. *J Reprod Immunol* 2009; 81:17-24.
36. Cohen-Lahav M, Shany S, Tobvin D, *et al.* Vitamin D decreases NFkappaB activity by increasing IkappaBalpha levels. *Nephrol Dial Transplant* 2006; 21:889-897.
37. Bodnar LM, Simhan HN. Vitamin D may be a link to black-white disparities in adverse birth outcomes. *Obstet Gynecol Surv* 2010; 65:273-284.
38. Holick MF, Binkley NC, Bischoff-Ferrari HA, *et al.* Evaluation, treatment, and prevention of vitamin D deficiency: an Endocrine Society clinical practice guideline. *J Clin Endocrinol Metab* 2011; 96:1911-1930.
39. De-Regil LM, Palacios C, Lombardo LK, *et al.* Vitamin D supplementation for women during pregnancy. *Sao Paulo Med* 2016; 134:274-275.
40. Dawodu A, Saadi HF, Bekdache G, *et al.* Randomized controlled trial (RCT) of vitamin D supplementation in pregnancy in a population with endemic vitamin D deficiency. *J Clin Endocrinol Metab* 2013; 98:2337-2346.
41. Hossain N, Kanani FH, Ramzan S, *et al.* Obstetric and neonatal outcomes of maternal vitamin D supplementation: results of an open-label, randomized controlled trial of antenatal vitamin D supplementation in Pakistani women. *J Clin Endocrinol Metab* 2014; 99:2448-2455.
42. Perez-Lopez FR, Pasupuleti V, Mezones-Holguin E, *et al.* Effect of vitamin D supplementation during pregnancy on maternal and neonatal outcomes: a systematic review and meta-analysis of randomized controlled trials. *Fertil Steril* 2015; 103:1278-1288 e1274.
43. Thorne-Lyman A, Fawzi WW. Vitamin D during pregnancy and maternal, neonatal and infant health outcomes: a systematic review and meta-analysis. *Paediatr Perinat Epidemiol* 2012; 26:75-90
44. Karras SN, Fakhoury H, Muscogiuri G, *et al.* Maternal vitamin D levels during pregnancy and neonatal health: evidence to date and clinical implications. *Ther Adv Musculoskelet Dis* 2016; 8(4):124-35.

**Table 1.** Characteristics of the included studies in the present meta-analysis

| Author                  | Region      | Year | Age at baseline (mean, year) | Pre-pregnancy BMI (mean, kg/m <sup>2</sup> ) | Gestational week of blood sampling | Measurement of vitamin D | SGA criteria      | Cut-off values | Ethnicity group                                                                                                                 | OR (95% CI)        | Adjusted | NOS Score | Sample size |
|-------------------------|-------------|------|------------------------------|----------------------------------------------|------------------------------------|--------------------------|-------------------|----------------|---------------------------------------------------------------------------------------------------------------------------------|--------------------|----------|-----------|-------------|
| Leffelaar <sup>15</sup> | Netherlands | 2010 | NA                           | NA                                           | 12-14 weeks                        | enzyme immunoassay       | <10 <sup>th</sup> | < 15 ng/ml     | Dutch (60.3%), Surinamese (6.7%), Turkish (4.0%), Moroccan (6.3%), Other non-western (14.2%), Other western (8.6%)              | 1.90(1.40,2.70)    | yes      | 8         | 3730        |
| Burris <sup>24</sup>    | USA         | 2012 | 32.5                         | 24.8                                         | 26-28 weeks                        | CLIA and RIA             | <10 <sup>th</sup> | < 10 ng/ml     | White (83.6%), Black (16.4%)                                                                                                    | 3.17(1.16,8.63)    | yes      | 7         | 1133        |
| Zhou <sup>25</sup>      | China       | 2014 | 29.5                         | 20.3                                         | 16-20 weeks                        | ECLIA                    | <10 <sup>th</sup> | < 20 ng/ml     | Asian                                                                                                                           | 2.46(0.71,8.46)    | no       | 8         | 1923        |
| Choi <sup>26</sup>      | Korea       | 2015 | 32.0                         | 20.2                                         | first or second or third trimester | LC-MS/MS                 | <10 <sup>th</sup> | < 20 ng/ml     | Asian                                                                                                                           | 0.448(0.149,1.351) | yes      | 6         | 220         |
| Ong <sup>18</sup>       | Singapore   | 2016 | 30.5                         | 26.1                                         | 26-28 weeks                        | LC-MS/MS                 | <10 <sup>th</sup> | < 20 ng/ml     | Asian                                                                                                                           | 1.00(0.56,1.79)    | yes      | 8         | 910         |
| Kiely <sup>27</sup>     | Ireland     | 2016 | 30.5                         | 24.9                                         | 14-16 weeks                        | LC-MS/MS                 | <10 <sup>th</sup> | < 20 ng/ml     | White (98%), Others (2%)                                                                                                        | 0.88(0.60,1.28)    | yes      | 6         | 1768        |
| Scholl <sup>28</sup>    | USA         | 2014 | 22.8                         | 26                                           | 13.8±5.6 weeks                     | HPLC                     | <10 <sup>th</sup> | < 20 ng/ml     | Hispanic (51.4%), Non-Hispanic black (34.4%), Non-Hispanic white (14.2%)                                                        | 0.930(0.568,1.523) | no       | 8         | 1045        |
| Chen <sup>4</sup>       | China       | 2015 | 27.5                         | NA                                           | first or second or third trimester | RIA                      | <10 <sup>th</sup> | < 20 ng/ml     | Asian                                                                                                                           | 6.47(4.30,9.75)    | yes      | 6         | 3658        |
| Boyle <sup>29</sup>     | New Zealand | 2016 | 30.3                         | 24.8                                         | 15 weeks                           | LC-MS/MS                 | <10 <sup>th</sup> | < 20 ng/ml     | NZ European (83.8%), other ethnicities (16.2%)                                                                                  | 1.33(0.91,1.96)    | yes      | 7         | 2065        |
| Berg <sup>30</sup>      | Netherlands | 2013 | NA                           | NA                                           | 12.9 weeks                         | enzyme immunoassay       | <10 <sup>th</sup> | < 20 ng/ml     | NA                                                                                                                              | 1.57(1.03,2.39)    | yes      | 7         | 2274        |
| Gerand <sup>16</sup>    | USA         | 2013 | NA                           | 22.3                                         | 20.6 weeks                         | LC-MS/MS                 | <10 <sup>th</sup> | <15 ng/ml      | White (52.1%), Black (41.6%), Puerto Rican (6.3%)                                                                               | 1.284(1.026,1.608) | no       | 6         | 2146        |
| Miliku <sup>31</sup>    | Netherlands | 2016 | 29.7                         | 23.7                                         | 20.3 weeks                         | LC-MS/MS                 | <15 <sup>th</sup> | <10 ng/ml      | European (57.3%), Cape Verdean (4.4%), Dutch Antillean (3.5%), Moroccan (6.6%), Surinamese (9.1%), Turkish (9.2%), Other (9.9%) | 2.07(1.33,3.22)    | yes      | 7         | 7176        |
| Nobles <sup>17</sup>    | USA         | 2015 | NA                           | >25                                          | first or second or third trimester | ECLIA                    | <10 <sup>th</sup> | < 20 ng/ml     | [White (75.6%), Black (13.5%)]                                                                                                  | 2.14(0.67,6.88)    | yes      | 8         | 237         |



1  
2  
3  
4  
5  
6  
7 CLIA: chemiluminescence immunoassay; RIA: radioimmunoassay; ECLIA: electrochemiluminescence immunoassay; LC-MS/MS: liquid chromatography-tandem  
8 mass spectrometry; NA: not available.  
9  
10  
11  
12  
13  
14  
15  
16  
17  
18  
19  
20  
21  
22  
23  
24  
25  
26  
27  
28  
29  
30  
31  
32  
33  
34  
35  
36  
37  
38  
39  
40  
41  
42  
43  
44  
45  
46  
47  
48  
49

For peer review only

**Table 2.** Subgroup analysis of the association between maternal Vitamin D deficiency and SGA

| Stratification group             | N                                    | P Value for OR | OR (95% CI)          | Heterogeneity test |         |
|----------------------------------|--------------------------------------|----------------|----------------------|--------------------|---------|
|                                  |                                      |                |                      | I-square (%)       | P Value |
| Study quality (NOS)              |                                      |                |                      |                    |         |
| High                             | 9 <sup>15 17 18 24 25 28-31</sup>    | <0.001         | 1.555 (1.239, 1.951) | 37.6               | 0.118   |
| Low                              | 4 <sup>4 16 26 27</sup>              | 0.440          | 1.441 (0.570, 3.641) | 95.2               | <0.001  |
| Gestation of blood sampling      |                                      |                |                      |                    |         |
| first trimester                  | 5 <sup>15 27 28 29 30</sup>          | 0.104          | 1.286 (0.950, 1.741) | 65.9               | 0.020   |
| second trimester                 | 5 <sup>16 18 24 25 31</sup>          | 0.011          | 1.577 (1.110, 2.240) | 51.1               | 0.085   |
| Mixed (first or second or third) | 3 <sup>4 17 26</sup>                 | 0.432          |                      | 90.6               | <0.001  |
| Cut-off values                   |                                      |                |                      |                    |         |
| < 10 ng/ml                       | 2 <sup>24 31</sup>                   | 0.001          | 2.219 (1.480, 3.325) | 0                  | 0.446   |
| < 15 ng/ml                       | 2 <sup>15 16</sup>                   | 0.029          | 1.532 (1.046, 2.246) | 73.2               | 0.054   |
| < 20 ng/ml                       | 9 <sup>4 17 18 25-30</sup>           | 0.172          | 1.448 (0.851, 2.465) | 88.2               | <0.001  |
| Sample size                      |                                      |                |                      |                    |         |
| > 1000                           | 10 <sup>4 15 16 24 25 27-31</sup>    | 0.003          | 1.760 (1.217, 2.544) | 86.8               | <0.001  |
| < 1000                           | 3 <sup>17 18 26</sup>                | 0.946          | 0.975 (0.476, 1.999) | 45.5               | 0.160   |
| Adjust for critical confounders  |                                      |                |                      |                    |         |
| yes                              | 10 <sup>4 15 17 18 24 26 29-31</sup> | 0.018          | 1.681 (1.094, 2.584) | 86.3               | <0.001  |
| no                               | 3 <sup>16 25 28</sup>                | 0.180          | 1.219 (0.912, 1.629) | 22.3               | 0.276   |
| Measurement of vitamin D         |                                      |                |                      |                    |         |
| LC-MS/MS                         | 6 <sup>16 18 26 27 29 31</sup>       | 0.204          | 1.195 (0.908, 1.573) | 59.5               | 0.031   |
| Others                           | 7 <sup>4 15 17 24 25 28 29</sup>     | 0.006          | 2.224 (1.263, 3.918) | 85.8               | <0.001  |

1  
2  
3  
4  
5  
6  
7  
8  
9  
10  
11  
12  
13  
14  
15  
16  
17  
18  
19  
20  
21  
22  
23  
24  
25  
26  
27  
28  
29  
30  
31  
32  
33  
34  
35  
36  
37  
38  
39  
40  
41  
42  
43  
44  
45  
46  
47  
48  
49

For peer review only

**Table 3.** Sensitivity analyses of the association between vitamin D deficiency and SGA

| Study omitted           | OR (95% CI)          | P value | I-square (%) | P value |
|-------------------------|----------------------|---------|--------------|---------|
| Leffelaar <sup>15</sup> | 1.559 (1.074, 2.263) | 0.020   | 85.2         | < 0.001 |
| Burris <sup>24</sup>    | 1.527 (1.08, 2.152)  | 0.016   | 85.1         | < 0.001 |
| Zhou <sup>25</sup>      | 1.557 (1.105, 2.195) | 0.011   | 85.4         | < 0.001 |
| Choi <sup>26</sup>      | 1.693 (1.211, 2.366) | 0.002   | 84.5         | < 0.001 |
| Ong <sup>18</sup>       | 1.652 (1.162, 2.350) | 0.005   | 85.0         | < 0.001 |
| Kiely <sup>27</sup>     | 1.686 (1.191, 2.387) | 0.003   | 83.4         | < 0.001 |
| Scholl <sup>28</sup>    | 1.669 (1.174, 2.371) | 0.004   | 84.6         | < 0.001 |
| Chen <sup>4</sup>       | 1.366 (1.103, 1.692) | 0.004   | 55.4         | 0.010   |
| Boyle <sup>29</sup>     | 1.616 (1.118, 2.335) | 0.011   | 85.4         | < 0.001 |
| Berg <sup>30</sup>      | 1.590 (1.102, 2.293) | 0.013   | 85.4         | < 0.001 |
| Gerand <sup>16</sup>    | 1.624 (1.100, 2.397) | 0.015   | 84.7         | < 0.001 |
| Miliku <sup>31</sup>    | 1.548 (1.079, 2.220) | 0.018   | 85.1         | < 0.001 |

1  
2  
3  
4  
5  
6  
7  
8  
9  
10  
11  
12  
13  
14  
15  
16  
17  
18  
19  
20  
21  
22  
23  
24  
25  
26  
27  
28  
29  
30  
31  
32  
33  
34  
35  
36  
37  
38  
39  
40  
41  
42  
43  
44  
45  
46  
47  
48  
49

|                      |                      |       |      |         |
|----------------------|----------------------|-------|------|---------|
| Nobles <sup>17</sup> | 1.565 (1.109, 2.209) | 0.011 | 85.4 | < 0.001 |
|----------------------|----------------------|-------|------|---------|

For peer review only

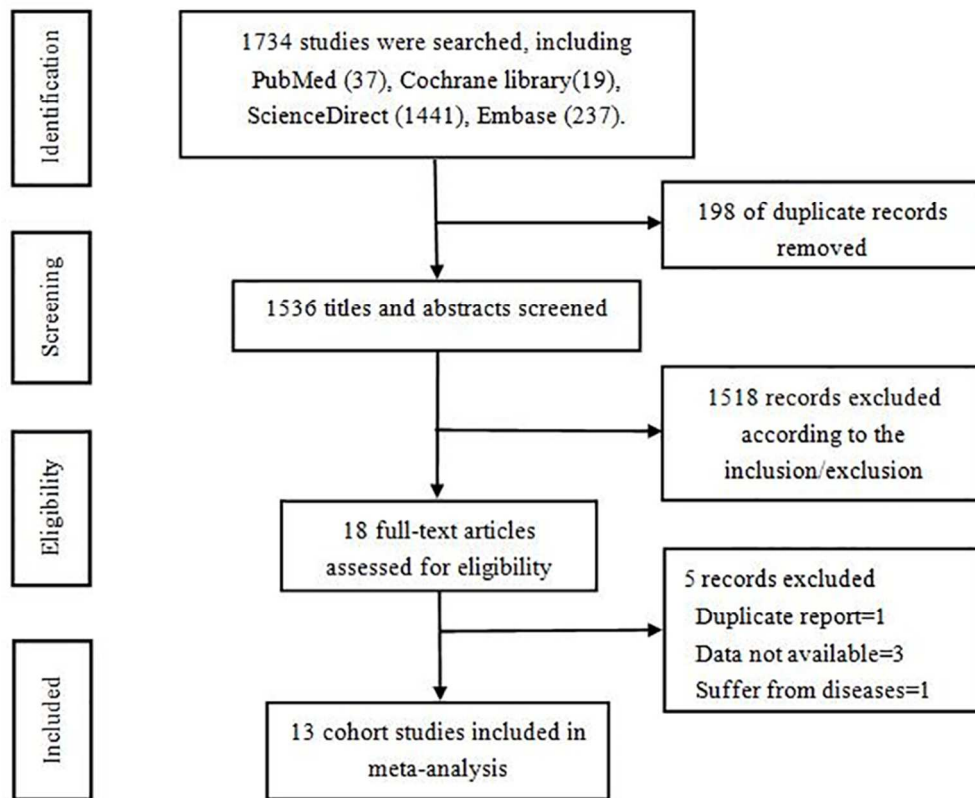

Figure1. Flowchart of the literature search and trial selection process

91x74mm (300 x 300 DPI)

1  
2  
3  
4  
5  
6  
7  
8  
9  
10  
11  
12  
13  
14  
15  
16  
17  
18  
19  
20  
21  
22  
23  
24  
25  
26  
27  
28  
29  
30  
31  
32  
33  
34  
35  
36  
37  
38  
39  
40  
41  
42  
43  
44  
45  
46  
47  
48  
49  
50  
51  
52  
53  
54  
55  
56  
57  
58  
59  
60

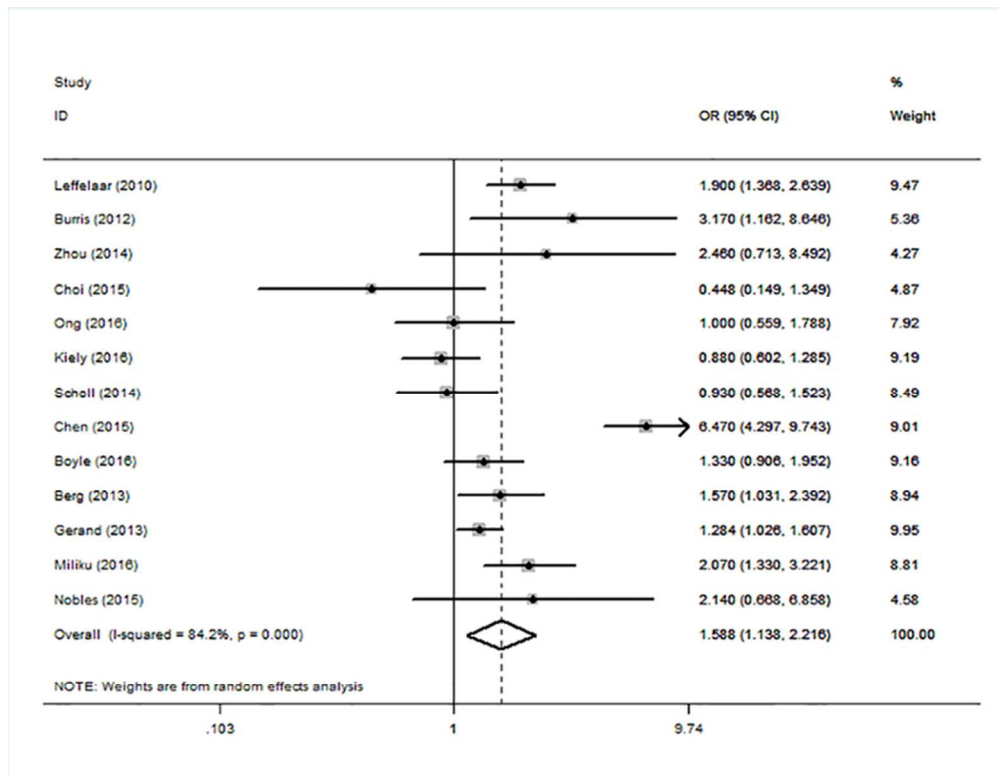

Figure 2. Forest plots of summary crude odds ratios of the association between vitamin D deficiency

91x70mm (300 x 300 DPI)

1  
2  
3  
4  
5  
6  
7  
8  
9  
10  
11  
12  
13  
14  
15  
16  
17  
18  
19  
20  
21  
22  
23  
24  
25  
26  
27  
28  
29  
30  
31  
32  
33  
34  
35  
36  
37  
38  
39  
40  
41  
42  
43  
44  
45  
46  
47  
48  
49  
50  
51  
52  
53  
54  
55  
56  
57  
58  
59  
60

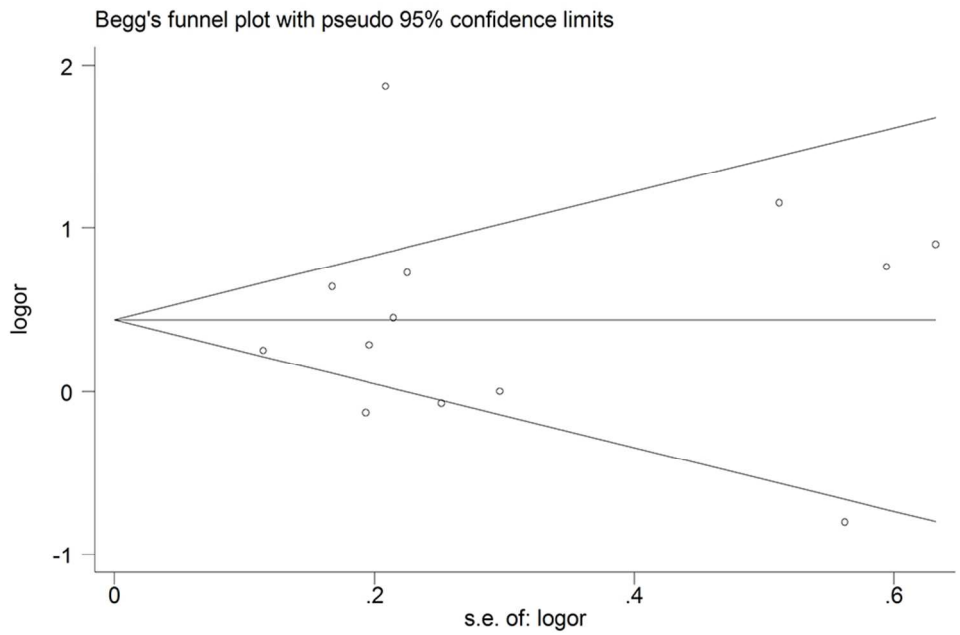

Figure 3. Funnel plot for small for gestational age. Log OR of the individual studies plotted against the standard error of log OR.

91x60mm (300 x 300 DPI)

View only



1  
2  
3  
4  
5 **Supplementary Box S1.** The search strategy of PubMed  
6  
7

---

8 #1 (vitamin D) OR (25-hydroxyvitamin D) OR cholecalciferol OR (25(OH)D)  
9

10 #2 (small for gestational age) OR (small-for-gestation age) OR (small size for gestational age) OR SGA  
11  
12

13 #3 #1 AND #2  
14  
15  
16  
17  
18  
19  
20  
21  
22  
23  
24  
25  
26  
27  
28  
29  
30  
31  
32  
33  
34  
35  
36  
37  
38  
39  
40  
41  
42  
43  
44  
45  
46  
47

---

**Supplementary Table S1.** Characteristics of the included studies in the present meta-analysis

| Author                  | Latitude                                     | The time of year data collected | Gestational age of infant at birth | The prevalence of SGA | The prevalence of vitamin D deficiency | Maternal education status                                                 | Season of blood sample                                       |
|-------------------------|----------------------------------------------|---------------------------------|------------------------------------|-----------------------|----------------------------------------|---------------------------------------------------------------------------|--------------------------------------------------------------|
| Leffelaar <sup>15</sup> | NA                                           | 2003.2~2004.3                   | 40.1±1.2 weeks                     | 9.2%                  | 23.1%                                  | ≤5 years (17.2%), 6-10years (38.5%), ≥11 years (44.3%)                    | Summer (43.6%)                                               |
| Burris <sup>24</sup>    | NA                                           | NA                              | 39.6 weeks                         | 4.8%                  | 32.4%                                  | College graduate (41.2%)                                                  | NA                                                           |
| Zhou <sup>25</sup>      | 23.1°N                                       | 2010.9~2011.8                   | NA                                 | 0.6%                  | 18.9%                                  | NA                                                                        | NA                                                           |
| Choi <sup>26</sup>      | 36.0°N                                       | 2012.4~2013.9                   | NA                                 | 10.9%                 | 77.3%                                  | ≤12 years(5.5%), > 12 years(94.5%)                                        | Spring (44.5%), Summer (10.0%), Fall (39.5%), Winter (5.9%)  |
| Ong <sup>18</sup>       | 1°22'N                                       | NA                              | NA                                 | 9.1%                  | 13.2%                                  | Primary and secondary (30.2%), Post-secondary (35.4%), University (34.4%) | NA                                                           |
| Kiely <sup>27</sup>     | 52°N                                         | 2008.3~2011.2                   | NA                                 | 10.7%                 | 44%                                    | Secondary (61%), Tertiary (39%)                                           | Winter (58.5%), Summer (41.5%)                               |
| Scholl <sup>28</sup>    | NA                                           | 2001~2007                       | 38.5                               | 7.2%                  | 33.7%                                  | NA                                                                        | NA                                                           |
| Chen <sup>4</sup>       | 31°52'N                                      | 2008.11~2010.10                 | NA                                 | 8.9%                  | 38.41%                                 | NA                                                                        | Spring (36.7%), Summer (22.5%), Fall (20.6%), Winter (20.2%) |
| Boyle <sup>29</sup>     | NA                                           | 2005~2008                       | NA                                 | 9.9%                  | 21.5%                                  | NA                                                                        | Spring (20.5%), Summer (26.4%), Fall (23.2%), Winter (29.8%) |
| Berg <sup>30</sup>      | 52°22'N                                      | 2003.2~2004.3                   | 20-42 weeks                        | 9.1%                  | NA                                     | NA                                                                        | Winter (55.5%)                                               |
| Gerand <sup>16</sup>    | ≥41°N(63.0%),<br>38~40°N(28.8%), ≤35°N(8.2%) | 1959~1965                       | 39.7±1.3 weeks                     | 18.4%                 | 34.8%                                  | NA                                                                        | Spring (25.9%), Summer (25.7%), Fall (24.6%), Winter (23.9%) |
| Miliku <sup>31</sup>    | NA                                           | 2002.4~2006.1                   | 35.9-42.3 weeks                    | 5.0%                  | 53.2%                                  | No higher education (59.2%), Higher education (40.8%)                     | Spring (29.5%), Summer (22.9%), Fall (24.0%), Winter (23.6%) |
| Nobles <sup>17</sup>    | NA                                           | 2007~2012                       | NA                                 | 9.6%                  | 20.7%                                  | ≤High school (55.2%), > High school (44.8%)                               | Summer (41.4%), Winter (58.7%)                               |

NA : not available.

Supplementary Box S2. Quality assessment of cohort studies

---

**NEWCASTLE - OTTAWA QUALITY ASSESSMENT SCALE**  
**COHORT STUDIES**

Note: A study can be awarded a maximum of one star for each numbered item within the Selection and Outcome categories. A maximum of two stars can be given for Comparability

**Selection**

1) Representativeness of the exposed cohort

- a) truly representative of the average \_\_\_\_\_ (describe) in the community \*
- b) somewhat representative of the average \_\_\_\_\_ in the community \*
- c) selected group of users eg nurses, volunteers
- d) no description of the derivation of the cohort

2) Selection of the non-exposed cohort

- a) drawn from the same community as the exposed cohort \*
- b) drawn from a different source
- c) no description of the derivation of the non-exposed cohort

3) Ascertainment of exposure

- a) secure record (eg surgical records) \*
- b) structured interview \*
- c) written self-report
- d) no description

4) Demonstration that outcome of interest was not present at start of study

- a) yes \*
- b) no

**Comparability**

1) Comparability of cohorts on the basis of the design or analysis

- a) study controls for \_\_\_\_\_ (select the most important factor) \*
- b) study controls for any additional factor \* (This criteria could be modified to indicate specific control for a second important factor.)

**Outcome**

1) Assessment of outcome

- a) independent blind assessment \*
- b) record linkage \*
- c) self-report
- d) no description

2) Was follow-up long enough for outcomes to occur

- a) yes (select an adequate follow up period for outcome of interest) \*
- b) no

3) Adequacy of follow up of cohorts

- a) complete follow up - all subjects accounted for \*
  - b) subjects lost to follow up unlikely to introduce bias - small number lost - > \_\_\_\_ % (select an adequate %) follow up, or description provided of those lost) \*
  - c) follow up rate < \_\_\_\_ % (select an adequate %) and no description of those lost
  - d) no statement
-

**Supplementary Table S2.** Quality scores of included studies on vitamin D status and SGA.

| Study                   | Selection                                |                                     |                           | Comparability                                                            |                                                             | Outcome               |                                                 | Total scores |                                  |
|-------------------------|------------------------------------------|-------------------------------------|---------------------------|--------------------------------------------------------------------------|-------------------------------------------------------------|-----------------------|-------------------------------------------------|--------------|----------------------------------|
|                         | Representativeness of the exposed cohort | Selection of the non-exposed cohort | Ascertainment of exposure | Demonstration that outcome of interest was not present at start of study | Comparability of cohorts on the basis of design or analysis | Assessment of outcome | Was follow-up long enough for outcomes to occur |              | Adequacy of follow up of cohorts |
| Leffelaar <sup>14</sup> | 1                                        | 1                                   | 1                         | 1                                                                        | 1                                                           | 1                     | 1                                               | 1            | 8                                |
| Burris <sup>23</sup>    | 1                                        | 1                                   | 1                         | 1                                                                        | 1                                                           | 1                     | 1                                               |              | 7                                |
| Zhou <sup>24</sup>      | 1                                        | 1                                   | 1                         | 1                                                                        | 1                                                           | 1                     | 1                                               | 1            | 8                                |
| Choi <sup>25</sup>      | 1                                        | 1                                   | 1                         | 1                                                                        | 1                                                           | 1                     |                                                 |              | 6                                |
| Ong <sup>17</sup>       | 1                                        | 1                                   | 1                         | 1                                                                        | 2                                                           | 1                     | 1                                               |              | 8                                |
| Kiely <sup>26</sup>     | 1                                        |                                     | 1                         | 1                                                                        | 1                                                           | 1                     | 1                                               |              | 6                                |
| Scholl <sup>27</sup>    | 1                                        | 1                                   | 1                         | 1                                                                        | 2                                                           |                       | 1                                               | 1            | 8                                |
| Chen <sup>4</sup>       | 1                                        | 1                                   | 1                         | 1                                                                        |                                                             | 1                     | 1                                               |              | 6                                |
| Boyle <sup>28</sup>     | 1                                        | 1                                   | 1                         | 1                                                                        | 1                                                           | 1                     | 1                                               |              | 7                                |
| Berg <sup>29</sup>      | 1                                        | 1                                   | 1                         | 1                                                                        | 1                                                           | 1                     | 1                                               |              | 7                                |
| Gerand <sup>15</sup>    | 1                                        | 1                                   | 1                         | 1                                                                        |                                                             | 1                     | 1                                               |              | 6                                |
| Miliku <sup>30</sup>    | 1                                        | 1                                   | 1                         | 1                                                                        | 1                                                           | 1                     | 1                                               |              | 7                                |
| Nobles <sup>16</sup>    | 1                                        | 1                                   | 1                         | 1                                                                        | 1                                                           | 1                     | 1                                               | 1            | 8                                |

1  
2  
3  
4  
5  
6  
7  
8  
9  
10  
11  
12  
13  
14  
15  
16  
17  
18  
19  
20  
21  
22  
23  
24  
25  
26  
27  
28  
29  
30  
31  
32  
33  
34  
35  
36  
37  
38  
39  
40  
41  
42  
43  
44  
45  
46  
47  
48  
49  
50  
51  
52  
53  
54  
55  
56  
57  
58  
59  
60

For peer review only

| Section and topic         | Item No | Checklist item                                                                                                                                                                                                                | Reported on page No |
|---------------------------|---------|-------------------------------------------------------------------------------------------------------------------------------------------------------------------------------------------------------------------------------|---------------------|
| Title:                    |         |                                                                                                                                                                                                                               |                     |
| Identification            | 1a      | Identify the report as a protocol of a systematic review                                                                                                                                                                      | 1                   |
| Update                    | 1b      | If the protocol is for an update of a previous systematic review, identify as such                                                                                                                                            |                     |
| Registration              | 2       | If registered, provide the name of the registry (such as PROSPERO) and registration number                                                                                                                                    |                     |
| Authors:                  |         |                                                                                                                                                                                                                               |                     |
| Contact                   | 3a      | Provide name, institutional affiliation, e-mail address of all protocol authors; provide physical mailing address of corresponding author                                                                                     | 1                   |
| Contributions             | 3b      | Describe contributions of protocol authors and identify the guarantor of the review                                                                                                                                           | 10                  |
| Amendments                | 4       | If the protocol represents an amendment of a previously completed or published protocol, identify as such and list changes; otherwise, state plan for documenting important protocol amendments                               |                     |
| Support:                  |         |                                                                                                                                                                                                                               |                     |
| Sources                   | 5a      | Indicate sources of financial or other support for the review                                                                                                                                                                 | 10                  |
| Sponsor                   | 5b      | Provide name for the review funder and/or sponsor                                                                                                                                                                             |                     |
| Role of sponsor or funder | 5c      | Describe roles of funder(s), sponsor(s), and/or institution(s), if any, in developing the protocol                                                                                                                            |                     |
| <b>INTRODUCTION</b>       |         |                                                                                                                                                                                                                               |                     |
| Rationale                 | 6       | Describe the rationale for the review in the context of what is already known                                                                                                                                                 | 3                   |
| Objectives                | 7       | Provide an explicit statement of the question(s) the review will address with reference to participants, interventions, comparators, and outcomes (PICO)                                                                      | 3                   |
| <b>METHODS</b>            |         |                                                                                                                                                                                                                               |                     |
| Eligibility criteria      | 8       | Specify the study characteristics (such as PICO, study design, setting, time frame) and report characteristics (such as years considered, language, publication status) to be used as criteria for eligibility for the review | 4                   |
| Information sources       | 9       | Describe all intended information sources (such as electronic databases, contact with study authors, trial registers or other grey literature sources) with planned dates of coverage                                         | 3                   |
| Search strategy           | 10      | Present draft of search strategy to be used for at least one electronic database, including planned limits, such that it could be repeated                                                                                    | 3                   |

|                                    |     |                                                                                                                                                                                                                                                  |           |
|------------------------------------|-----|--------------------------------------------------------------------------------------------------------------------------------------------------------------------------------------------------------------------------------------------------|-----------|
| Study records:                     |     |                                                                                                                                                                                                                                                  |           |
| Data management                    | 11a | Describe the mechanism(s) that will be used to manage records and data throughout the review                                                                                                                                                     | 8         |
| Selection process                  | 11b | State the process that will be used for selecting studies (such as two independent reviewers) through each phase of the review (that is, screening, eligibility and inclusion in meta-analysis)                                                  | 4,18      |
| Data collection process            | 11c | Describe planned method of extracting data from reports (such as piloting forms, done independently, in duplicate), any processes for obtaining and confirming data from investigators                                                           | 4,18      |
| Data items                         | 12  | List and define all variables for which data will be sought (such as PICO items, funding sources), any pre-planned data assumptions and simplifications                                                                                          | 14        |
| Outcomes and prioritization        | 13  | List and define all outcomes for which data will be sought, including prioritization of main and additional outcomes, with rationale                                                                                                             | 14-16     |
| Risk of bias in individual studies | 14  | Describe anticipated methods for assessing risk of bias of individual studies, including whether this will be done at the outcome or study level, or both; state how this information will be used in data synthesis                             | 16        |
| Data synthesis                     | 15a | Describe criteria under which study data will be quantitatively synthesised                                                                                                                                                                      | 5         |
|                                    | 15b | If data are appropriate for quantitative synthesis, describe planned summary measures, methods of handling data and methods of combining data from studies, including any planned exploration of consistency (such as $I^2$ , Kendall's $\tau$ ) | 5         |
|                                    | 15c | Describe any proposed additional analyses (such as sensitivity or subgroup analyses, meta-regression)                                                                                                                                            | 15        |
|                                    | 15d | If quantitative synthesis is not appropriate, describe the type of summary planned                                                                                                                                                               | 5         |
| Meta-bias(es)                      | 16  | Specify any planned assessment of meta-bias(es) (such as publication bias across studies, selective reporting within studies)                                                                                                                    | 7         |
| Confidence in cumulative evidence  | 17  | Describe how the strength of the body of evidence will be assessed (such as GRADE)                                                                                                                                                               | 7,9,16,20 |

# BMJ Open

## Association between maternal vitamin D deficiency and small for gestational age: evidence from a meta-analysis of prospective cohort studies

|                                 |                                                                                                                                                                                                                                                                                                     |
|---------------------------------|-----------------------------------------------------------------------------------------------------------------------------------------------------------------------------------------------------------------------------------------------------------------------------------------------------|
| Journal:                        | <i>BMJ Open</i>                                                                                                                                                                                                                                                                                     |
| Manuscript ID                   | bmjopen-2017-016404.R2                                                                                                                                                                                                                                                                              |
| Article Type:                   | Research                                                                                                                                                                                                                                                                                            |
| Date Submitted by the Author:   | 30-Jun-2017                                                                                                                                                                                                                                                                                         |
| Complete List of Authors:       | Chen, Yao; Anhui Medical University, School of Public Health<br>Zhu, Beibei; Anhui Medical University, School of Public Health<br>Wu, Xiaoyan<br>Li, Si; Anhui Medical University, School of Public Health<br>Tao, Fangbiao; Anhui Provincial Key Laboratory of Population Health and Aristogenics, |
| <b>Primary Subject Heading</b>: | Public health                                                                                                                                                                                                                                                                                       |
| Secondary Subject Heading:      | Nutrition and metabolism                                                                                                                                                                                                                                                                            |
| Keywords:                       | vitamin D, small for gestational age, cohort study, meta-analysis                                                                                                                                                                                                                                   |
|                                 |                                                                                                                                                                                                                                                                                                     |

SCHOLARONE™  
Manuscripts



1  
2  
3 **Association between maternal vitamin D deficiency and small for gestational age:**  
4 **evidence from a meta-analysis of prospective cohort studies**  
5  
6

7 Yao Chen<sup>1</sup>, Beibei Zhu<sup>1,2</sup>, Xiaoyan Wu<sup>1,2</sup>, Si Li<sup>3</sup>, Fangbiao Tao<sup>1,2</sup>  
8

9 <sup>1</sup>Department of Maternal, Child and Adolescent Health, School of Public Health,  
10 Anhui Medical University, Hefei, China  
11

12 <sup>2</sup>Anhui Provincial Key Laboratory of Population Health and Aristogenics, Hefei,  
13 China  
14

15 <sup>3</sup>Department of Epidemiology and Biostatistics, School of Public Health, Anhui  
16 Medical University, Hefei, China.  
17  
18

19  
20 **Correspondence to:** Fangbiao Tao, Department of Maternal, Child and Adolescent  
21 Health, School of Public Health, Anhui Medical University, 81Meishan Road, Hefei,  
22 Anhui, 230032, P.R.China. Tel.: +86 551 65161169.  
23  
24

25 Email: taofangbiao@126.com  
26  
27  
28  
29  
30  
31  
32  
33  
34  
35  
36  
37  
38  
39  
40  
41  
42  
43  
44  
45  
46  
47  
48  
49  
50  
51  
52  
53  
54  
55  
56  
57  
58  
59  
60

1  
2  
3  
4  
5  
6  
7  
8  
9  
10  
11  
12  
13  
14  
15  
16  
17  
18  
19  
20  
21  
22  
23  
24  
25  
26  
27  
28  
29  
30  
31  
32  
33  
34  
35  
36  
37  
38  
39  
40  
41  
42  
43  
44  
45  
46  
47  
48  
49  
50  
51  
52  
53  
54  
55  
56  
57  
58  
59  
60

## 15 ABSTRACT

16 **Objective:** To determine whether maternal vitamin D deficiency during pregnancy is  
17 associated with small for gestational age (SGA).

18 **Methods:** A comprehensive literature search of PubMed, the Cochrane Library,  
19 Embase, and the Elsevier ScienceDirect library was conducted to identify relevant  
20 articles reporting prospective cohort studies in English, with the last report included  
21 published in February 2017. Pooled odds ratios (*ORs*) and corresponding 95%  
22 confidence intervals (*CI*s) were used to evaluate the correlation in a random effects  
23 model.

24 **Results:** A total of 13 cohort studies were included in this meta-analysis with a  
25 sample of 28285 individuals from seven countries. The pooled overall *OR* for babies  
26 with born SGA was 1.588 (95% *CI* 1.138 to 2.216;  $P < 0.01$ ) for women with vitamin  
27 D deficiency. The prevalence of vitamin D deficiency during pregnancy varied from  
28 13.2% to 77.3%. Subgroup analyses identified no significant differences in the  
29 association between vitamin D deficiency and SGA based on study quality, gestational  
30 week during which blood sampling was performed, cut-off vitamin D levels, sample  
31 size, adjustment for critical confounders and method for measuring vitamin D.

32 **Conclusion:** This meta-analysis suggests that vitamin D deficiency is associated with  
33 an increased risk of SGA.

34 **Keywords:** vitamin D; small for gestational age; cohort study; meta-analysis.

35 **Strengths and limitations of this study:** 1) To our knowledge, this was the first  
36 systematic review that included only prospective cohort studies in its evaluation of the  
37 association between vitamin D and SGA. 2) The subgroup analysis performed in this  
38 study enabled more thorough understanding of current evidence. 3) Cohort study  
39 quality tests, a heterogeneity test, and sensitivity analysis were performed; publication  
40 bias was evaluated. 4) Different definitions of vitamin D deficiency, insufficiency, or  
41 sufficiency may have affected the results. 5) Substantial heterogeneity existed among  
42 several outcomes.

43

## 44 INTRODUCTION

45 Vitamin D is fat-soluble and a steroid hormone recognized for its major role in  
46 calcium metabolism and bone health.<sup>1</sup> Vitamin D deficiency or insufficiency has  
47 become a global public health issue,<sup>2</sup> especially for pregnant women, among whom  
48 the highest deficiency rate is 84% according to a multiethnic population survey  
49 conducted in Norway.<sup>3</sup> Several large-population studies have evaluated the  
50 associations of maternal vitamin D deficiency with various adverse maternal and fetal  
51 outcomes<sup>4-6</sup> including small for gestational age (SGA).

52 SGA infants are defined as smaller in size than normal for the gestational age, most  
53 commonly stipulated by a weight less than the 10th percentile for the corresponding  
54 gestational age.<sup>7-8</sup> The incidence of SGA infants worldwide is 9.7%,<sup>9</sup> and this  
55 percentage is increasing. Infants born SGA have much higher neonatal morbidity and  
56 mortality.<sup>10</sup> Katz et al.<sup>11</sup> demonstrated that the pooled risk ratios (*RRs*) of neonatal  
57 mortality and post-neonatal morbidity in infants who were SGA were 1.83 and 1.90,  
58 respectively. SGA infants may also be strongly correlated with adverse health  
59 outcomes in adult life, such as neurocognitive impairment, poor school performance,  
60 short stature, and increased risks of diabetes,<sup>12</sup> cardiovascular disease,<sup>13</sup> and kidney  
61 disease.<sup>14</sup>

62 Although numerous studies have focused on the association between maternal  
63 vitamin D status and SGA, the results of these studies remain inconsistent. A  
64 prospective cohort study conducted in the Netherlands evaluated vitamin D  
65 concentrations in 3,730 pregnant women after 12-14 weeks of gestation and  
66 discovered that infants born to mothers with vitamin D deficiency had an increased  
67 risk of being SGA compared with those born to mothers with adequate vitamin D  
68 levels.<sup>15</sup> Subsequently, Gernand et al.<sup>16</sup> reported that if the maternal vitamin D level  
69 was less than 15 ng/mL, infants had a significantly higher risk of being SGA.  
70 However, other studies have identified no association between vitamin D status and  
71 SGA.<sup>17-18</sup>

72 Given the inconclusive evidence regarding this issue, we summarize the highest

1  
2  
3 73 quality evidence currently available on the basis of a meta-analysis of prospective  
4  
5 74 cohort studies to determine whether vitamin D deficiency in pregnant women is  
6  
7 75 associated with SGA.  
8  
9

## 10 76 **MATERIALS AND METHODS**

### 11 77 **Data sources, search strategy, and selection criteria**

12  
13  
14 78 A systematic literature search was performed using the PubMed, Elsevier  
15  
16 79 ScienceDirect, Cochrane Library, and Embase databases to identify all relevant  
17  
18 80 articles published prior to March 2017. No restrictions were placed regarding  
19  
20 81 maternal age, and study design. The following keywords were used:  
21  
22 82 'vitamin D' or 'cholecalciferol' or '25-hydroxyvitamin D' or '25(OH)D' combined  
23  
24 83 with 'SGA' or 'small for gestational age' or 'small-for-gestation-age' or 'small size for  
25  
26 84 gestational age' (see online supplementary box S1 details the search strategy)  
27

### 28 85 **Selection criteria**

29  
30 86 We first screened the titles and abstracts of all the articles to identify possible eligible  
31  
32 87 studies, and then read the articles in full to determine whether they were in fact  
33  
34 88 eligible. The articles included in the meta-analysis were selected according to the  
35  
36 89 following inclusion criteria: (1) published in English; (2) the population of the study  
37  
38 90 was pregnant women without pre-chronic disease; (3) only women with singleton  
39  
40 91 gestation were included; (4) the outcome was SGA infant, the control group included  
41  
42 92 women who gave birth to babies not SGA, and the exposure was 'vitamin D  
43  
44 93 deficiency' [25(OH)D < 20ng/mL]; (5) study data were in the form of effect estimates  
45  
46 94 [odds ratio (*OR*) or *RR*] and corresponding 95% confidence intervals (*CI*), or the  
47  
48 95 article reported data that enable calculation of these; (6) maternal blood samples were  
49  
50 96 taken for assessing 25(OH)D during pregnancy; (7) the study design was that of a  
51  
52 97 cohort study. The final criterion was applied because cohort studies are the most  
53  
54 98 effective means of ascertaining both the incidence and natural history of a disorder.  
55  
56 99 The temporal connection between putative cause and outcome is usually clear in such  
57  
58 100 studies; in addition, the cohort study design reduces the risk of survivor bias. By  
59  
60

1  
2  
3 101 contrast, this bias often frustrates cross-sectional and case-control studies. For  
4  
5 102 example, case-control studies are more prone to recall and selection biases and are  
6  
7 103 uncertain regarding chronological order, making them of limited use for causal  
8  
9 104 inference.

### 105 **Data extraction and quality evaluation**

106 Two investigators reviewed all abstracts of related articles, and read their full text,  
107 respectively. We extracted data using a standardized form and assessed study quality.  
108 Disagreements were resolved by discussion and consulting a third investigator. The  
109 following data were collected from each study: (1) publication information: first  
110 author name, and publication year; (2) population's characteristics: country of origin,  
111 average age and pre-pregnancy body mass index (BMI), ethnicity, education status,  
112 current gestational week of blood sampling, gestational age of infant at birth, and  
113 season of blood sample; (3) methods: assay of serum or plasma vitamin D levels and  
114 sample size; (4) latitude and time of year that data were collected; (5) *OR* and  
115 corresponding 95% *CI* for each study. If available, *ORs* with 95% *CI*s were collected  
116 from the original article. If crucial original data were unavailable, *ORs* with 95% *CI*s  
117 were calculated using other data published in the article to construct  $2 \times 2$  tables of  
118 low vitamin D status versus the presence or absence of SGA. Otherwise, we contacted  
119 the corresponding author by e-mail to obtain further details. Finally, we assessed the  
120 eligible studies based on the Newcastle Ottawa Scale (NOS). This scale ranges from 0  
121 to 9 and contains nine items (1 point for each) in three parts: selection (four items),  
122 comparability (two items) and exposure or outcomes (three items). Scores of 0-3  
123 indicated studies to being of poor quality; scores of 4-6 indicated studies to being of  
124 moderate quality; and scores of 7 or higher indicated studies to be of high quality  
125 (supplementary box S2).

### 126 **Statistical analysis**

127 The data extracted from eligible studies were in the form of effect estimates (*OR* or  
128 *RR*) and corresponding 95% *CI*s. Due to the low level of morbidity in babies born of

1  
2  
3  
4 129 SGA, the *OR* was approximately equal to the *RR*.<sup>19</sup> Meta-analysis was performed  
5  
6 130 using the STATA package version 12.0 (Stata Corporation, College Station, TX, USA).  
7  
8 131 The *ORs* and 95% *CI*s for normal vitamin D levels versus deficient vitamin D levels  
9  
10 132 from each study were combined to calculate an estimated pooled *OR*, 95% *CI*, and *P*  
11  
12 133 value. The *Q*-statistic test and I-squared ( $I^2$ ) test were used to estimate the  
13  
14 134 heterogeneity among studies.<sup>20</sup> The random effects model is usually more suitable  
15  
16 135 when study data are gathered from the published literature.<sup>21</sup> Therefore, the random  
17  
18 136 effects model was used in our meta-analysis. To evaluate the sources of heterogeneity  
19  
20 137 and the various results obtained for pre-specified subgroups, subgroup analysis was  
21  
22 138 performed based on cut-off values, study quality (NOS scores), adjustment for critical  
23  
24 139 confounders, sample size, measurement of vitamin D, and the gestational week in  
25  
26 140 which blood sampling was performed. A sensitivity analysis was conducted to  
27  
28 141 determine the stability and reliability of the results by omitting one study at a time and  
29  
30 142 confirming the consistency of the overall effect estimate. Funnel plots were used to  
31  
32 143 qualitatively assess the publication bias, whereas Egger's and Begg's tests were used  
33  
34 144 to quantitatively assess publication bias.<sup>22 23</sup>

## 35 **RESULTS**

### 36 **Description of included studies**

37  
38 147 A total of 1734 studies were identified for initial review using the described search  
39  
40 148 strategies. After removing duplicates, 1536 studies remained. We screened the titles  
41  
42 149 and abstracts of these studies and excluded 1518 records according to the inclusion  
43  
44 150 and exclusion criteria. The 18 remaining full-text articles were then assessed for  
45  
46 151 eligibility. Finally, 13 cohort studies<sup>4 15-18 24-31</sup> were included in the meta-analysis  
47  
48 152 (figure 1), with a total sample of 28 285 pregnant women.

49  
50 153 The characteristics and methodological quality of the 13 studies are presented in  
51  
52 154 table 1 and supplementary table S1. These studies were published between 2010 and  
53  
54 155 2016; four were conducted in the United states, three in the Netherlands, two in China  
55  
56 156 and one each in Korea, Singapore, Ireland, and New Zealand. The average age of the

1  
2  
3 157 pregnant women in these studies was <30 years for four studies and >30 years for five  
4  
5 158 studies; the average pre-pregnancy BMI of the participants was <25 kg/m<sup>2</sup> in seven  
6  
7 159 studies and >25 kg/m<sup>2</sup> in three studies. Ten studies adjusted for confounders and three  
8  
9 160 studies have not. Five studies collected blood during the first trimester, five during the  
10  
11 161 second trimester, and three during a mixture of the first, second, and third trimesters.  
12  
13 162 Five assay methods were used to measure the vitamin D levels of pregnant women,  
14  
15 163 and two criteria were used for the diagnosis of SGA infants (birthweight in the lowest  
16  
17 164 10th or 15th percentile of the reference population). The prevalence of maternal  
18  
19 165 vitamin D deficiency varied from 13.2% to 77.3% (supplementary table S1). NOS  
20  
21 166 scores were presented as either representing high levels (nine studies) or low levels  
22  
23 167 (four studies) (supplementary table S2).

### 24 25 168 **Meta-analysis results**

26  
27 169 The overall results revealed that maternal vitamin D deficiency during pregnancy was  
28  
29 170 significantly associated with an increased risk of SGA infants (pooled *OR* = 1.588; 95%  
30  
31 171 *CI* 1.138 to 2.216; *P* < 0.01) in the random effects model. A forest plot showing the  
32  
33 172 details is presented in figure 2.

### 34 35 173 **Subgroup analysis**

36  
37 174 Due to the existence of heterogeneity (*I*<sup>2</sup> = 84.2%; *P* < 0.001), subgroup analysis was  
38  
39 175 performed to investigate the possible sources of heterogeneity in the meta-analysis  
40  
41 176 (table 2). The subgroups were created based on cut-off vitamin D levels, measurement  
42  
43 177 of vitamin D, sample size, study quality (NOS score), whether the study adjusted for  
44  
45 178 critical confounders, and the gestational week in which blood sampling was  
46  
47 179 performed. In subgroup analyses, the confidence intervals for each subgroup was  
48  
49 180 overlapped, indicating no significant differences in the effect estimates. Thus, there  
50  
51 181 were no differences in the association between vitamin D deficiency and SGA infants  
52  
53 182 based on study quality, time of blood sampling, cut-off vitamin D levels, sample size,  
54  
55 183 adjustment for critical confounders, and measurement of vitamin D (table 2).  
56  
57 184 However, we did not conduct subgroup analyses regarding ethnicity, pre-pregnancy



1  
2  
3 185 BMI, gestational age of infant at birth, and season during which blood sampling was  
4  
5 186 performed due to insufficient or unspecific data in some studies.  
6  
7

### 8 187 **Sensitivity analysis and publication bias**

9  
10 188 To evaluate the stability of our results, sensitivity analysis was performed. Chen's  
11 189 study<sup>4</sup> was discovered to be responsible for most of the heterogeneity in this  
12  
13 190 meta-analysis. Excluding that study resulted in low heterogeneity among the  
14  
15 191 remaining studies ( $I^2 = 55.4\%$ ,  $P = 0.010$ ) with a pooled *OR* of 1.336 (95% *CI* 1.103  
16  
17 192 to 1.692). Furthermore, there were no obvious changes in the pooled *ORs* as a result  
18  
19 193 of the exclusion of any other single study; the pooled *ORs* obtained ranged from 1.366  
20  
21 194 (95% *CI* 1.103 to 1.692) to 1.693 (95% *CI* 1.211 to 2.366), and each was statistically  
22  
23 195 significant (table 3). Additionally, no publication bias was identified using Begg's test  
24  
25 196 ( $P = 0.669$ ) and Egger's regression test ( $P = 0.815$ ). A funnel plot displaying the  
26  
27 197 details is presented in figure 3.  
28

### 29 198 **DISCUSSION**

30  
31 199 The prevalence of vitamin D deficiency during pregnancy and its association with the  
32  
33 200 risk of SGA infants are attracting increasing attentions. The present meta-analysis of  
34  
35 201 prospective cohort studies suggested that vitamin D deficiency is significantly  
36  
37 202 associated with a higher risk of SGA. No publication bias was detected, and  
38  
39 203 sensitivity analysis demonstrated that no single study markedly affected the results,  
40  
41 204 which indicated that the results of our meta-analysis are stable and reliable.  
42

43 205 The findings of our study are in agreement with several previous studies. One  
44  
45 206 previous meta-analysis showed that a low maternal vitamin D levels during pregnancy  
46  
47 207 may be associated with an increased risk of SGA, gestational diabetes mellitus, and  
48  
49 208 preterm birth.<sup>5</sup> Similarly, another vital meta-analysis suggested that vitamin D  
50  
51 209 insufficiency was associated with an increased risk of SGA, preeclampsia, and  
52  
53 210 bacterial vaginosis.<sup>6</sup> However, those meta-analyses included both case-control and  
54  
55 211 prospective cohort studies and did not include the most recently published cohort  
56  
57 212 studies; additionally, they did not evaluate the association using specific subgroup  
58  
59  
60



1  
2  
3 213 analysis. Moreover, the cut-off vitamin D levels differed between different studies.  
4  
5 214 Thus, we conducted this meta-analysis to provide stronger evidence for the  
6  
7 215 association between vitamin D and SGA.

8  
9 216 The heterogeneity test (Cochran  $Q$  test) revealed significant heterogeneity among  
10  
11 217 the studies in this meta-analysis. We investigated the potential factors affecting the  
12  
13 218 results by performing subgroup analysis. The results of the subgroup analyses  
14  
15 219 demonstrated no significant differences in the association between vitamin D  
16  
17 220 deficiency and SGA based on study quality, gestational week during which blood  
18  
19 221 sampling was performed, cut-off values, sample size, adjustment for critical  
20  
21 222 confounders and measurement of vitamin D; however, other factors may have  
22  
23 223 contributed to the heterogeneity in our meta-analysis. Maternal ethnicity, season  
24  
25 224 during which blood sampling was performed, and sunlight exposure and diet during  
26  
27 225 pregnancy are confounding factors for the association between vitamin D deficiency  
28  
29 226 and SGA. Sensitivity analysis revealed that exclusion of any single study did not  
30  
31 227 materially alter the overall combined effect, but also that Chen's study<sup>4</sup> probably  
32  
33 228 contributed greatly to the heterogeneity observed. Therefore, we should interpret the  
34  
35 229 results of this meta-analysis objectively.

36  
37 230 The underlying mechanism through which vitamin D deficiency increases the risk  
38  
39 231 of SGA infants is not entirely clear but may be related to the inflammatory response.  
40  
41 232 Vitamin D deficiency can increase levels of proinflammatory cytokines, leading to  
42  
43 233 oxidative stress. Lower 25(OH)D status is associated with increased vascular  
44  
45 234 endothelial cell expression of nuclear factor  $\kappa$ B (NF $\kappa$ B) and interleukin 6 and with  
46  
47 235 decreased expression of vitamin D receptor and 1- $\alpha$  hydroxylase.<sup>32</sup> One study reported  
48  
49 236 that levels of pro-inflammatory cytokines in the cord blood of SGA infants were  
50  
51 237 significantly higher than those in the cord blood of non-SGA infants.<sup>33</sup> Mullins et al.<sup>34</sup>  
52  
53 238 reported that more tumor necrosis factor (TNF- $\alpha$ ) was expressed in pregnant women  
54  
55 239 who born SGA infants than normal infants of pregnant women, and as a critical  
56  
57 240 inflammatory factor, TNF- $\alpha$  was previously revealed to inhibit placental hormone  
58  
59 241 synthesis and stimulate calcitriol catabolism through the regulation of enzymes.<sup>35</sup>  
60

1  
2  
3 242 Vitamin D may also play a crucial role in innate and adaptive immunity by inhibiting  
4  
5 243 the decidual NFκB pathway to reduce inflammatory response, because NFκB is a  
6  
7 244 main transcription factor of inflammatory mediators.<sup>36</sup>  
8

9 245 Maternal vitamin D deficiency is common and is influenced by numerous variables  
10  
11 246 including ethnicity, region of residence, skin pigmentation, sun exposure, season, age,  
12  
13 247 and vitamin D supplementation.<sup>37</sup> The American Association of Endocrinology states  
14  
15 248 that pregnant women require at least 600 IU/d of vitamin D and that at least  
16  
17 249 1500-2000 IU/d of vitamin D may be necessary to maintain a blood level of >30  
18  
19 250 ng/mL.<sup>38</sup> However, recommendations of vitamin D supplementation for pregnant  
20  
21 251 women are scant. Vitamin D supplementation during pregnancy was suggested as an  
22  
23 252 intervention to prevent adverse pregnancy outcomes.<sup>39</sup> A randomized controlled trial  
24  
25 253 reported that maternal vitamin D supplementation of 2000 or 4000 IU/d appeared to  
26  
27 254 be safe during pregnancy, and the most effective supplementation for optimizing  
28  
29 255 serum vitamin D concentrations in mothers and their infants was 4000 IU/d.<sup>40</sup> This  
30  
31 256 result is consistent with another randomized controlled trial in Pakistan.<sup>41</sup> In two  
32  
33 257 studies, low vitamin D levels during pregnancy increased the risk of SGA, however,  
34  
35 258 vitamin D supplementation did not significantly reduce the risk of SGA (*OR* = 0.78,  
36  
37 259 *95% CI* 0.50 to 1.21<sup>42</sup> and *OR* = 0.67, *95% CI* 0.40 to 1.11<sup>43</sup>). Another study found it  
38  
39 260 difficult to draw a final conclusion regarding the need for vitamin D supplementation  
40  
41 261 during pregnancy.<sup>44</sup> Therefore, larger randomized controlled trials are required to  
42  
43 262 assess the value of such interventions, and will have a significant impact on the  
44  
45 263 guidance regarding perinatal care.

46 264 Our study had several strengths. First, to ensure that evidence was reliable, we  
47  
48 265 included only prospective cohort studies, which have more advantages than case  
49  
50 266 control studies. Second, no publication bias was present in our meta-analysis,  
51  
52 267 indicating that its results may be unbiased and credible. Finally, our study's subgroup  
53  
54 268 analysis enabled thorough understanding of the current evidence. However, several  
55  
56 269 limitations should also be acknowledged. The association between maternal vitamin  
57  
58 270 D status and SGA risk may have been affected by confounding factors such as

1  
2  
3 271 pre-pregnancy BMI, age, education, ethnicity, and sunlight exposure; not all the  
4  
5 272 included studies controlled for these confounding factors. Additionally, the included  
6  
7 273 studies had different definitions of vitamin D deficiency, insufficiency, or sufficiency,  
8  
9 274 which may have affected the results. Lastly, pooled data without detailed individual  
10  
11 275 information were used to perform the meta-analysis, which restricted us from  
12  
13 276 obtaining comprehensive results.

## 14 15 16 277 **CONCLUSIONS**

17  
18 278 The present study indicates that a low vitamin D levels is associated with an increased  
19  
20 279 risk of SGA infants. Further confirmation of these findings in larger-sample size  
21  
22 280 studies is required. The role of vitamin D in the pathogenesis of SGA should be  
23  
24 281 emphasized. Additionally, early screening for vitamin D deficiency among pregnant  
25  
26 282 women may be necessary.

27  
28 283 **Contributors** FT contributed to study design; SL, XW and BZ contributed analysis  
29  
30 284 tools and methods; YC analyzed the data and drafted the manuscript; BZ and FT  
31  
32 285 revised the manuscript. All authors read and approved the final version of the  
33  
34 286 manuscript.

35  
36  
37 287 **Funding** This work is grateful for the financial support offered by the National  
38  
39 288 Natural Science Foundation of China (81330068, 81573168)

40  
41  
42 289 **Data sharing statement** No additional data are available

43  
44  
45 290 **Competing interests** None declared.  
46  
47  
48  
49  
50  
51  
52  
53  
54  
55  
56  
57  
58  
59  
60

## REFERENCES

1. Finberg L. Vitamin D deficiency and rickets. *J Pediatr Endocrinol Metab* 2006; 19:203.
2. Palacios C, Gonzalez L. Is vitamin D deficiency a major global public health problem? *J Steroid Biochem Mol Biol* 2014; 144 Pt A:138-145.
3. Eggemoen AR, Falk RS, Knutsen KV, *et al.* Vitamin D deficiency and supplementation in pregnancy in a multiethnic population-based cohort. *BMC pregnancy and childbirth* 2016; 16:7.
4. Chen YH, Fu L, Hao JH, *et al.* Maternal vitamin D deficiency during pregnancy elevates the risks of small for gestational age and low birth weight infants in Chinese population. *J Clin Endocrinol Metab* 2015; 100:1912-1919.
5. Wei SQ, Qi HP, Luo ZC, *et al.* Maternal vitamin D status and adverse pregnancy outcomes: a systematic review and meta-analysis. *J Matern Fetal Neonatal Med* 2013; 26:889-899.
6. Aghajafari F, Nagulesapillai T, Ronksley PE, *et al.* Association between maternal serum 25-hydroxyvitamin D level and pregnancy and neonatal outcomes: systematic review and meta-analysis of observational studies. *BMJ* 2013; 346:f1169.
7. Mikolajczyk RT, Zhang J, Betran AP, *et al.* A global reference for fetal-weight and birthweight percentiles. *Lancet* 2011; 377:1855-1861.
8. Hoftiezer L, Hukkelhoven CW, Hogeveen M, *et al.* Defining small-for-gestational-age: prescriptive versus descriptive birthweight standards. *Eur J Pediatr* 2016; 175:1047-1057.
9. Ding G, Tian Y, Zhang Y, *et al.* Application of a global reference for fetal-weight and birthweight percentiles in predicting infant mortality. *BJOG* 2013; 120(13):1613-1621.
10. Christian P, Murray-Kolb LE, Tielsch JM, *et al.* Associations between preterm birth, small-for-gestational age, and neonatal morbidity and cognitive function among school-age children in Nepal. *BMC pediatrics* 2014; 14:58.
11. Katz J, Lee AC, Kozuki N, *et al.* Mortality risk in preterm and small-for-gestational-age infants in low-income and middle-income countries: a pooled country analysis. *Lancet* 2013; 382(9890):417-425.
12. de Zegher F, Sebastiani G, Diaz M, *et al.* Body composition and circulating high-molecular-weight adiponectin and IGF-I in infants born small for gestational age: breast-versus formula-feeding. *Diabetes* 2012; 61:1969-1973.
13. Wolfenstetter A, Simonetti GD, Poschl J, *et al.* Altered cardiovascular rhythmicity in children born small for gestational age. *Hypertension* 2012; 60:865-870.
14. Aly H, Davies J, El-Dib M, *et al.* Renal function is impaired in small for gestational age premature infants. *J Matern Fetal Neonatal Med* 2013; 26:388-391.
15. Leffelaar ER, Vrijkotte TG, van Eijsden M. Maternal early pregnancy vitamin D status in relation to fetal and neonatal growth: results of the multi-ethnic Amsterdam Born Children and their Development cohort. *Br J Nutr* 2010; 104:108-117.
16. Gernand AD, Simhan HN, Klebanoff MA, *et al.* Maternal serum 25-hydroxyvitamin D and measures of newborn and placental weight in a U.S. multicenter cohort study. *J Clin Endocrinol Metab* 2013; 98:398-404.
17. Nobles CJ, Markenson G, Chasan-Taber L. Early pregnancy vitamin D status and risk for adverse maternal and infant outcomes in a bi-ethnic cohort: the Behaviors Affecting Baby and You (B.A.B.Y.) Study. *Br J Nutr* 2015; 114:2116-2128.

18. Ong YL, Quah PL, Tint MT, *et al.* The association of maternal vitamin D status with infant birth outcomes, postnatal growth and adiposity in the first 2 years of life in a multi-ethnic Asian population: the Growing Up in Singapore Towards healthy Outcomes (GUSTO) cohort study. *Br J Nutr* 2016; 116:621-631.
19. Gagne JJ, Power MC. Anti-inflammatory drugs and risk of Parkinson disease: a meta-analysis. *Neurology* 2010; 74:995-1002.
20. Takkouche B, Cadarso-Suarez C, Spiegelman D. Evaluation of old and new tests of heterogeneity in epidemiologic meta-analysis. *Am J Epidemiol* 1999; 150:206-215.
21. Borenstein M, Hedges LV, Higgins JP, *et al.* A basic introduction to fixed-effect and random-effects models for meta-analysis. *Res Synth Methods* 2010; 1(2):97-111.22. Egger M, Davey Smith G, Schneider M, *et al.* Bias in meta-analysis detected by a simple, graphical test. *BMJ* 1997; 315:629-634.
23. Begg CB, Mazumdar M. Operating characteristics of a rank correlation test for publication bias. *Biometrics* 1994; 50:1088-1101.
24. Burris HH, Rifas-Shiman SL, Camargo CA, *et al.* Plasma 25-hydroxyvitamin D during pregnancy and small-for-gestational age in black and white infants. *Ann Epidemiol* 2012; 22:581-586.
25. Zhou J, Su L, Liu M, *et al.* Associations between 25-hydroxyvitamin D levels and pregnancy outcomes: a prospective observational study in southern China. *Eur J Clin Nutr* 2014; 68:925-930.
26. Choi R, Kim S, Yoo H, *et al.* High prevalence of vitamin D deficiency in pregnant Korean women: the first trimester and the winter season as risk factors for vitamin D deficiency. *Nutrients* 2015; 7:3427-3448.
27. Kiely ME, Zhang JY, Kinsella M, *et al.* Vitamin D status is associated with uteroplacental dysfunction indicated by pre-eclampsia and small-for-gestational-age birth in a large prospective pregnancy cohort in Ireland with low vitamin D status. *Am J Clin Nutr* 2016; 104:354-361.
28. Scholl TO, Chen X, Stein TP. Maternal calcium metabolic stress and fetal growth. *Am J Clin Nutr* 2014; 99:918-925.
29. Boyle VT, Thorstensen EB, Mourath D, *et al.* The relationship between 25-hydroxyvitamin D concentration in early pregnancy and pregnancy outcomes in a large, prospective cohort. *Br J Nutr* 2016; 116:1409-1415.
30. van den Berg G, van Eijnsden M, Vrijkotte TG, *et al.* Suboptimal maternal vitamin D status and low education level as determinants of small-for-gestational-age birth weight. *Eur J Nutr* 2013; 52:273-279.
31. Miliku K, Vinkhuyzen A, Blanken LM, *et al.* Maternal vitamin D concentrations during pregnancy, fetal growth patterns, and risks of adverse birth outcomes. *Am J Clin Nutr* 2016; 103:1514-1522.
32. Jablonski KL, Chonchol M, Pierce GL, *et al.* 25-Hydroxyvitamin D deficiency is associated with inflammation-linked vascular endothelial dysfunction in middle-aged and older adults. *Hypertension* 2011; 57:63-69.
33. Lausten-Thomsen U, Olsen M, Greisen G, *et al.* Inflammatory markers in umbilical cord blood from small-for-gestational-age newborns. *Fetal Pediatr Pathol* 2014; 33:114-118.
34. Mullins E, Prior T, Roberts I, *et al.* Changes in the maternal cytokine profile in pregnancies complicated by fetal growth restriction. *Am J Reprod Immunol* 2012; 68:1-7.

- 1
  - 2
  - 3
  - 4
  - 5
  - 6
  - 7
  - 8
  - 9
  - 10
  - 11
  - 12
  - 13
  - 14
  - 15
  - 16
  - 17
  - 18
  - 19
  - 20
  - 21
  - 22
  - 23
  - 24
  - 25
  - 26
  - 27
  - 28
  - 29
  - 30
  - 31
  - 32
  - 33
  - 34
  - 35
  - 36
  - 37
  - 38
  - 39
  - 40
  - 41
  - 42
  - 43
  - 44
  - 45
  - 46
  - 47
  - 48
  - 49
  - 50
  - 51
  - 52
  - 53
  - 54
  - 55
  - 56
  - 57
  - 58
  - 59
  - 60
35. Diaz L, Noyola-Martinez N, Barrera D, *et al.* Calcitriol inhibits TNF-alpha-induced inflammatory cytokines in human trophoblasts. *J Reprod Immunol* 2009; 81:17-24.
36. Cohen-Lahav M, Shany S, Tobvin D, *et al.* Vitamin D decreases NFkappaB activity by increasing IkappaBalpha levels. *Nephrol Dial Transplant* 2006; 21:889-897.
37. Bodnar LM, Simhan HN. Vitamin D may be a link to black-white disparities in adverse birth outcomes. *Obstet Gynecol Surv* 2010; 65:273-284.
38. Holick MF, Binkley NC, Bischoff-Ferrari HA, *et al.* Evaluation, treatment, and prevention of vitamin D deficiency: an Endocrine Society clinical practice guideline. *J Clin Endocrinol Metab* 2011; 96:1911-1930.
39. De-Regil LM, Palacios C, Lombardo LK, *et al.* Vitamin D supplementation for women during pregnancy. *Sao Paulo Med* 2016; 134:274-275.
40. Dawodu A, Saadi HF, Bekdache G, *et al.* Randomized controlled trial (RCT) of vitamin D supplementation in pregnancy in a population with endemic vitamin D deficiency. *J Clin Endocrinol Metab* 2013; 98:2337-2346.
41. Hossain N, Kanani FH, Ramzan S, *et al.* Obstetric and neonatal outcomes of maternal vitamin D supplementation: results of an open-label, randomized controlled trial of antenatal vitamin D supplementation in Pakistani women. *J Clin Endocrinol Metab* 2014; 99:2448-2455.
42. Perez-Lopez FR, Pasupuleti V, Mezones-Holguin E, *et al.* Effect of vitamin D supplementation during pregnancy on maternal and neonatal outcomes: a systematic review and meta-analysis of randomized controlled trials. *Fertil Steril* 2015; 103:1278-1288.
43. Thorne-Lyman A, Fawzi WW. Vitamin D during pregnancy and maternal, neonatal and infant health outcomes: a systematic review and meta-analysis. *Paediatr Perinat Epidemiol* 2012; 26:75-90
44. Karras SN, Fakhoury H, Muscogiuri G, *et al.* Maternal vitamin D levels during pregnancy and neonatal health: evidence to date and clinical implications. *Ther Adv Musculoskelet Dis* 2016; 8(4):124-135.

1  
2  
3  
4  
5  
6  
7  
8  
9  
10  
11  
12  
13  
14  
15  
16  
17  
18  
19  
20  
21  
22  
23  
24  
25  
26  
27  
28  
29  
30  
31  
32  
33  
34  
35  
36  
37  
38  
39  
40  
41  
42  
43  
44  
45  
46  
47  
48  
49

**Figure legends:**

Figure 1. Flowchart of the literature search and trial selection process.

Figure 2. Forest plots of summary crude odds ratios of the association between vitamin D deficiency.

Figure 3. Funnel plot for small for gestational age. Log OR of the individual studies plotted against the standard error of log OR.

For peer review only

**Table 1.** Characteristics of the included studies in the present meta-analysis

1  
2  
3  
4  
5  
6  
7  
8  
9  
10  
11  
12  
13  
14  
15  
16  
17  
18  
19  
20  
21  
22  
23  
24  
25  
26  
27  
28  
29  
30  
31  
32  
33  
34  
35  
36  
37  
38  
39  
40  
41  
42  
43  
44  
45  
46  
47  
48  
49

| Author                  | Region      | Year | Age at baseline (mean, year) | Pre-pregnancy BMI (mean, kg/m <sup>2</sup> ) | Gestational week of blood sampling | Measurement of vitamin D | SGA criteria      | Cut-off values | Ethnicity group                                                                                                                 | OR (95% CI)         | Adjusted | NOS Score | Sample size |
|-------------------------|-------------|------|------------------------------|----------------------------------------------|------------------------------------|--------------------------|-------------------|----------------|---------------------------------------------------------------------------------------------------------------------------------|---------------------|----------|-----------|-------------|
| Leffelaar <sup>15</sup> | Netherlands | 2010 | NA                           | NA                                           | 12-14 weeks                        | enzyme immunoassay       | <10 <sup>th</sup> | < 15 ng/ml     | Dutch (60.3%), Surinamese (6.7%), Turkish (4.0%), Moroccan (6.3%), Other non-western (14.2%), Other western (8.6%)              | 1.90 (1.40,2.70)    | yes      | 8         | 3730        |
| Burris <sup>24</sup>    | USA         | 2012 | 32.5                         | 24.8                                         | 26-28 weeks                        | CLIA and RIA             | <10 <sup>th</sup> | < 10 ng/ml     | White (83.6%), Black (16.4%)                                                                                                    | 3.17 (1.16,8.63)    | yes      | 7         | 1133        |
| Zhou <sup>25</sup>      | China       | 2014 | 29.5                         | 20.3                                         | 16-20 weeks                        | ECLIA                    | <10 <sup>th</sup> | < 20 ng/ml     | Asian                                                                                                                           | 2.46 (0.71,8.46)    | no       | 8         | 1923        |
| Choi <sup>26</sup>      | Korea       | 2015 | 32.0                         | 20.2                                         | first or second or third trimester | LC-MS/MS                 | <10 <sup>th</sup> | < 20 ng/ml     | Asian                                                                                                                           | 0.448 (0.149,1.351) | yes      | 6         | 220         |
| Ong <sup>18</sup>       | Singapore   | 2016 | 30.5                         | 26.1                                         | 26-28 weeks                        | LC-MS/MS                 | <10 <sup>th</sup> | < 20 ng/ml     | Asian                                                                                                                           | 1.00 (0.56,1.79)    | yes      | 8         | 910         |
| Kiely <sup>27</sup>     | Ireland     | 2016 | 30.5                         | 24.9                                         | 14-16 weeks                        | LC-MS/MS                 | <10 <sup>th</sup> | < 20 ng/ml     | White (98%), Others (2%)                                                                                                        | 0.88 (0.60,1.28)    | yes      | 6         | 1768        |
| Scholl <sup>28</sup>    | USA         | 2014 | 22.8                         | 26                                           | 13.8±5.6 weeks                     | HPLC                     | <10 <sup>th</sup> | < 20 ng/ml     | Hispanic (51.4%), Non-Hispanic black (34.4%), Non-Hispanic white (14.2%)                                                        | 0.930 (0.568,1.523) | no       | 8         | 1045        |
| Chen <sup>4</sup>       | China       | 2015 | 27.5                         | NA                                           | first or second or third trimester | RIA                      | <10 <sup>th</sup> | < 20 ng/ml     | Asian                                                                                                                           | 6.47 (4.30,9.75)    | yes      | 6         | 3658        |
| Boyle <sup>29</sup>     | New Zealand | 2016 | 30.3                         | 24.8                                         | 15 weeks                           | LC-MS/MS                 | <10 <sup>th</sup> | < 20 ng/ml     | NZ European (83.8%), other ethnicities (16.2%)                                                                                  | 1.33 (0.91,1.96)    | yes      | 7         | 2065        |
| Berg <sup>30</sup>      | Netherlands | 2013 | NA                           | NA                                           | 12.9 weeks                         | enzyme immunoassay       | <10 <sup>th</sup> | < 20 ng/ml     | NA                                                                                                                              | 1.57 (1.03,2.39)    | yes      | 7         | 2274        |
| Gerand <sup>16</sup>    | USA         | 2013 | NA                           | 22.3                                         | 20.6 weeks                         | LC-MS/MS                 | <10 <sup>th</sup> | <15 ng/ml      | White (52.1%), Black (41.6%), Puerto Rican (6.3%)                                                                               | 1.284 (1.026,1.608) | no       | 6         | 2146        |
| Miliku <sup>31</sup>    | Netherlands | 2016 | 29.7                         | 23.7                                         | 20.3 weeks                         | LC-MS/MS                 | <15 <sup>th</sup> | <10 ng/ml      | European (57.3%), Cape Verdean (4.4%), Dutch Antillean (3.5%), Moroccan (6.6%), Surinamese (9.1%), Turkish (9.2%), Other (9.9%) | 2.07 (1.33,3.22)    | yes      | 7         | 7176        |
| Nobles <sup>17</sup>    | USA         | 2015 | NA                           | >25                                          | first or second or third trimester | ECLIA                    | <10 <sup>th</sup> | < 20 ng/ml     | [White (75.6%), Black (13.5%)]                                                                                                  | 2.14 (0.67,6.88)    | yes      | 8         | 237         |



1  
2  
3  
4  
5  
6  
7  
8  
9  
10  
11  
12  
13  
14  
15  
16  
17  
18  
19  
20  
21  
22  
23  
24  
25  
26  
27  
28  
29  
30  
31  
32  
33  
34  
35  
36  
37  
38  
39  
40  
41  
42  
43  
44  
45  
46  
47  
48  
49

CLIA: chemiluminescence immunoassay; RIA: radioimmunoassay; ECLIA: electrochemiluminescence immunoassay; LC-MS/MS: liquid chromatography-tandem mass spectrometry; NA: not available.

**Table 2.** Subgroup analysis of the association between maternal Vitamin D deficiency and SGA

| Stratification group             | N                                    | P Value for OR | OR (95% CI)          | Heterogeneity test |         |
|----------------------------------|--------------------------------------|----------------|----------------------|--------------------|---------|
|                                  |                                      |                |                      | I-square (%)       | P Value |
| Study quality (NOS)              |                                      |                |                      |                    |         |
| High                             | 9 <sup>15 17 18 24 25 28-31</sup>    | <0.001         | 1.555 (1.239, 1.951) | 37.6               | 0.118   |
| Low                              | 4 <sup>4 16 26 27</sup>              | 0.440          | 1.441 (0.570, 3.641) | 95.2               | <0.001  |
| Gestation of blood sampling      |                                      |                |                      |                    |         |
| first trimester                  | 5 <sup>15 27 28 29 30</sup>          | 0.104          | 1.286 (0.950, 1.741) | 65.9               | 0.020   |
| second trimester                 | 5 <sup>16 18 24 25 31</sup>          | 0.011          | 1.577 (1.110, 2.240) | 51.1               | 0.085   |
| Mixed (first or second or third) | 3 <sup>4 17 26</sup>                 | 0.432          |                      | 90.6               | <0.001  |
| Cut-off values                   |                                      |                |                      |                    |         |
| <10 ng/ml                        | 2 <sup>24 31</sup>                   | 0.001          | 2.219 (1.480, 3.325) | 0                  | 0.446   |
| <15 ng/ml                        | 2 <sup>15 16</sup>                   | 0.029          | 1.532 (1.046, 2.246) | 73.2               | 0.054   |
| <20 ng/ml                        | 9 <sup>4 17 18 25-30</sup>           | 0.172          | 1.448 (0.851, 2.465) | 88.2               | <0.001  |
| Sample size                      |                                      |                |                      |                    |         |
| > 1000                           | 10 <sup>4 15 16 24 25 27-31</sup>    | 0.003          | 1.760 (1.217, 2.544) | 86.8               | <0.001  |
| < 1000                           | 3 <sup>17 18 26</sup>                | 0.946          | 0.975 (0.476, 1.999) | 45.5               | 0.160   |
| Adjust for critical confounders  |                                      |                |                      |                    |         |
| yes                              | 10 <sup>4 15 17 18 24 26 29-31</sup> | 0.018          | 1.681 (1.094, 2.584) | 86.3               | < 0.001 |
| no                               | 3 <sup>16 25 28</sup>                | 0.180          | 1.219 (0.912, 1.629) | 22.3               | 0.276   |

| Measurement of vitamin D |                                  |       |                      |      |        |
|--------------------------|----------------------------------|-------|----------------------|------|--------|
| LC-MS/MS                 | 6 <sup>16 18 26 27 29 31</sup>   | 0.204 | 1.195 (0.908, 1.573) | 59.5 | 0.031  |
| Others                   | 7 <sup>4 15 17 24 25 28 29</sup> | 0.006 | 2.224 (1.263, 3.918) | 85.8 | <0.001 |

**Table 3.** Sensitivity analyses of the association between vitamin D deficiency and SGA

| Study omitted           | OR (95% CI)          | P value | I-square (%) | P value |
|-------------------------|----------------------|---------|--------------|---------|
| Leffelaar <sup>15</sup> | 1.559 (1.074, 2.263) | 0.020   | 85.2         | < 0.001 |
| Burris <sup>24</sup>    | 1.527 (1.084, 2.152) | 0.016   | 85.1         | < 0.001 |
| Zhou <sup>25</sup>      | 1.557 (1.105, 2.195) | 0.011   | 85.4         | < 0.001 |
| Choi <sup>26</sup>      | 1.693 (1.211, 2.366) | 0.002   | 84.5         | < 0.001 |
| Ong <sup>18</sup>       | 1.652 (1.162, 2.350) | 0.005   | 85.0         | < 0.001 |
| Kiely <sup>27</sup>     | 1.686 (1.191, 2.387) | 0.003   | 83.4         | < 0.001 |
| Scholl <sup>28</sup>    | 1.669 (1.174, 2.371) | 0.004   | 84.6         | < 0.001 |
| Chen <sup>4</sup>       | 1.366 (1.103, 1.692) | 0.004   | 55.4         | 0.010   |
| Boyle <sup>29</sup>     | 1.616 (1.118, 2.335) | 0.011   | 85.4         | < 0.001 |
| Berg <sup>30</sup>      | 1.590 (1.102, 2.293) | 0.013   | 85.4         | < 0.001 |
| Gerand <sup>16</sup>    | 1.624 (1.100, 2.397) | 0.015   | 84.7         | < 0.001 |

1  
2  
3  
4  
5  
6  
7  
8  
9  
10  
11  
12  
13  
14  
15  
16  
17  
18  
19  
20  
21  
22  
23  
24  
25  
26  
27  
28  
29  
30  
31  
32  
33  
34  
35  
36  
37  
38  
39  
40  
41  
42  
43  
44  
45  
46  
47  
48  
49

---

|                      |                      |       |      |         |
|----------------------|----------------------|-------|------|---------|
| Miliku <sup>31</sup> | 1.548 (1.079, 2.220) | 0.018 | 85.1 | < 0.001 |
| Nobles <sup>17</sup> | 1.565 (1.109, 2.209) | 0.011 | 85.4 | < 0.001 |

---

For peer review only

1  
2  
3  
4  
5  
6  
7  
8  
9  
10  
11  
12  
13  
14  
15  
16  
17  
18  
19  
20  
21  
22  
23  
24  
25  
26  
27  
28  
29  
30  
31  
32  
33  
34  
35  
36  
37  
38  
39  
40  
41  
42  
43  
44  
45  
46  
47  
48  
49  
50  
51  
52  
53  
54  
55  
56  
57  
58  
59  
60

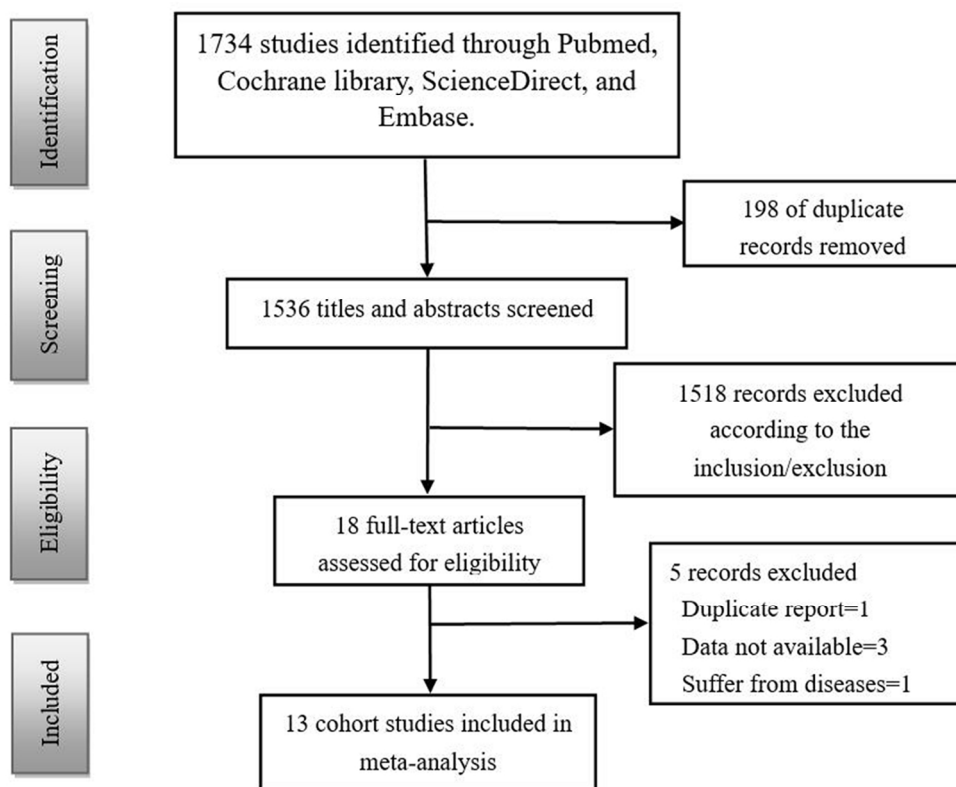

Figure 1. Flowchart of the literature search and trial selection process

129x105mm (300 x 300 DPI)

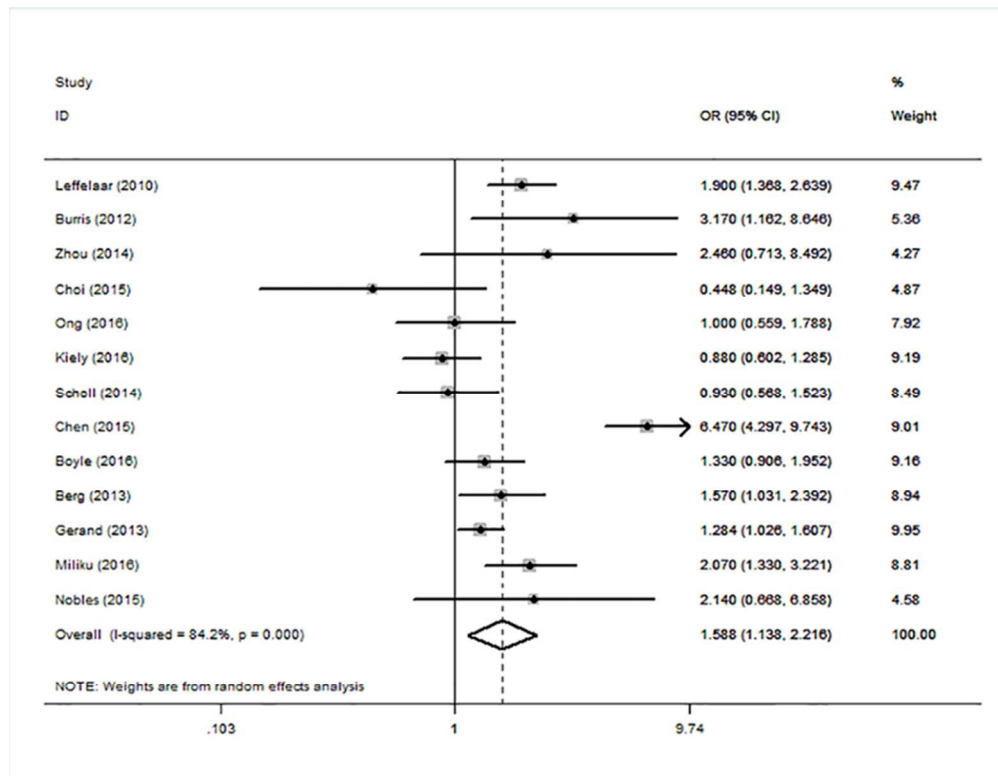

33 Figure 2. Forest plots of summary crude odds ratios of the association between vitamin D deficiency

34 91x70mm (300 x 300 DPI)

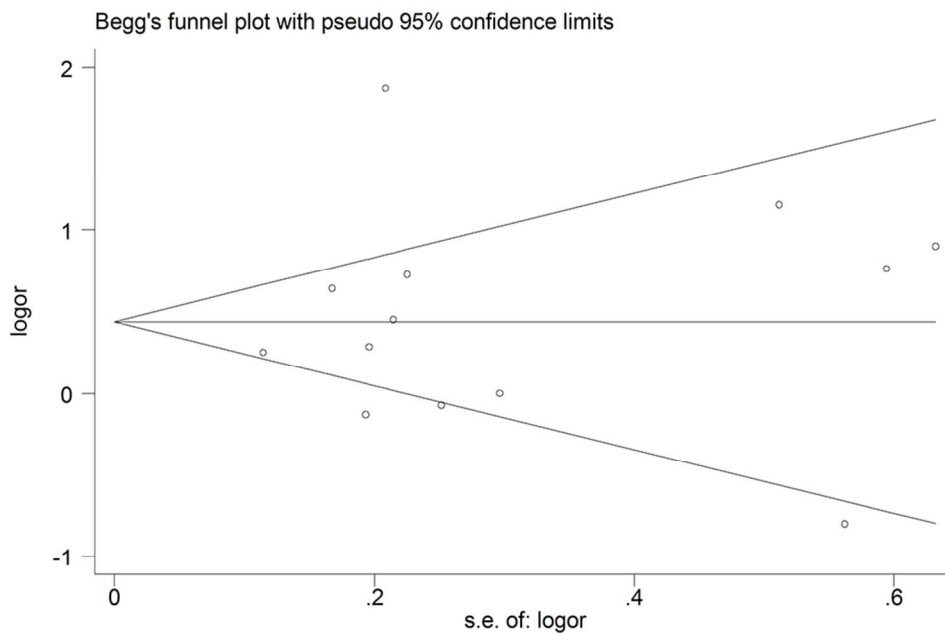

Figure 3. Funnel plot for small for gestational age. Log OR of the individual studies plotted against the standard error of log OR.

91x60mm (300 x 300 DPI)

View only

1  
2  
3  
4  
5  
6  
7  
8  
9  
10  
11  
12  
13  
14  
15  
16  
17  
18  
19  
20  
21  
22  
23  
24  
25  
26  
27  
28  
29  
30  
31  
32  
33  
34  
35  
36  
37  
38  
39  
40  
41  
42  
43  
44  
45  
46  
47  
48  
49  
50  
51  
52  
53  
54  
55  
56  
57  
58  
59  
60

**Supplementary Box S1.** The search strategy of PubMed

---

Source: PubMed

Search on: February 28th, 2017

#1 (((("vitamin D"[Mesh] OR "cholecalciferol"[Mesh]) OR "25-hydroxyvitamin D"[Title/Abstract]) OR "25(OH)D"[Title/Abstract])

#2 (((("small for gestational age"[Title/Abstract] OR "small-for-gestation-age"[Title/Abstract]) OR "small size for gestational age"[Title/Abstract]) OR SGA [Title/Abstract])

#3 #1 AND #2

---

The search strategy in other databases did some adjustments on the basis of the above database.

**Supplementary Table S1.** Characteristics of the included studies in the present meta-analysis

| Author                  | Latitude                                     | The time of year data collected | Gestational age of infant at birth | The prevalence of SGA | The prevalence of vitamin D deficiency | Maternal education status                                                 | Season of blood sample                                          |
|-------------------------|----------------------------------------------|---------------------------------|------------------------------------|-----------------------|----------------------------------------|---------------------------------------------------------------------------|-----------------------------------------------------------------|
| Leffelaar <sup>15</sup> | NA                                           | 2003.2~2004.3                   | 40.1±1.2 weeks                     | 9.2%                  | 23.1%                                  | ≤5 years (17.2%), 6-10years (38.5%), ≥11 years (44.3%)                    | Summer (43.6%)                                                  |
| Burris <sup>24</sup>    | NA                                           | NA                              | 39.6 weeks                         | 4.8%                  | 32.4%                                  | College graduate (41.2%)                                                  | NA                                                              |
| Zhou <sup>25</sup>      | 23.1°N                                       | 2010.9~2011.8                   | NA                                 | 0.6%                  | 18.9%                                  | NA                                                                        | NA                                                              |
| Choi <sup>26</sup>      | 36.0°N                                       | 2012.4~2013.9                   | NA                                 | 10.9%                 | 77.3%                                  | ≤12 years(5.5%), > 12 years(94.5%)                                        | Spring (44.5%), Summer (10.0%),<br>Fall (39.5%), Winter (5.9%)  |
| Ong <sup>18</sup>       | 1°22'N                                       | NA                              | NA                                 | 9.1%                  | 13.2%                                  | Primary and secondary (30.2%), Post-secondary (35.4%), University (34.4%) | NA                                                              |
| Kiely <sup>27</sup>     | 52°N                                         | 2008.3~2011.2                   | NA                                 | 10.7%                 | 44.0%                                  | Secondary (61%), Tertiary (39%)                                           | Winter (58.5%), Summer (41.5%)                                  |
| Scholl <sup>28</sup>    | NA                                           | 2001~2007                       | 38.5                               | 7.2%                  | 33.7%                                  | NA                                                                        | NA                                                              |
| Chen <sup>4</sup>       | 31°52'N                                      | 2008.11~2010.10                 | NA                                 | 8.9%                  | 38.41%                                 | NA                                                                        | Spring (36.7%), Summer (22.5%),<br>Fall (20.6%), Winter (20.2%) |
| Boyle <sup>29</sup>     | NA                                           | 2005~2008                       | NA                                 | 9.9%                  | 21.5%                                  | NA                                                                        | Spring (20.5%), Summer (26.4%),<br>Fall (23.2%), Winter (29.8%) |
| Berg <sup>30</sup>      | 52°22'N                                      | 2003.2~2004.3                   | 20-42 weeks                        | 9.1%                  | NA                                     | NA                                                                        | Winter (55.5%)                                                  |
| Gerand <sup>16</sup>    | ≥41°N(63.0%),<br>38~40°N(28.8%), ≤35°N(8.2%) | 1959~1965                       | 39.7±1.3 weeks                     | 18.4%                 | 34.8%                                  | NA                                                                        | Spring (25.9%), Summer (25.7%),<br>Fall (24.6%), Winter (23.9%) |
| Miliku <sup>31</sup>    | NA                                           | 2002.4~2006.1                   | 35.9-42.3 weeks                    | 5.0%                  | 53.2%                                  | No higher education (59.2%), Higher education (40.8%)                     | Spring (29.5%), Summer (22.9%),<br>Fall (24.0%), Winter (23.6%) |
| Nobles <sup>17</sup>    | NA                                           | 2007~2012                       | NA                                 | 9.6%                  | 20.7%                                  | ≤High school (55.2%), > High school (44.8%)                               | Summer (41.4%), Winter (58.7%)                                  |

NA : not available.



1  
2  
3  
4  
5  
6  
7  
8  
9  
10  
11  
12  
13  
14  
15  
16  
17  
18  
19  
20  
21  
22  
23  
24  
25  
26  
27  
28  
29  
30  
31  
32  
33  
34  
35  
36  
37  
38  
39  
40  
41  
42  
43  
44  
45  
46  
47  
48  
49  
50  
51  
52  
53  
54  
55  
56  
57  
58  
59  
60

Supplementary Box S2. Quality assessment of cohort studies

---

**NEWCASTLE - OTTAWA QUALITY ASSESSMENT SCALE**  
**COHORT STUDIES**

Note: A study can be awarded a maximum of one star for each numbered item within the Selection and Outcome categories. A maximum of two stars can be given for Comparability

**Selection**

1) Representativeness of the exposed cohort

a) truly representative of the average \_\_\_\_\_ (describe) in the community \*

b) somewhat representative of the average \_\_\_\_\_ in the community \*

c) selected group of users eg nurses, volunteers

d) no description of the derivation of the cohort

2) Selection of the non-exposed cohort

a) drawn from the same community as the exposed cohort \*

b) drawn from a different source

c) no description of the derivation of the non-exposed cohort

3) Ascertainment of exposure

a) secure record (eg surgical records) \*

b) structured interview \*

c) written self-report

d) no description

4) Demonstration that outcome of interest was not present at start of study

a) yes \*

b) no

**Comparability**

1) Comparability of cohorts on the basis of the design or analysis

a) study controls for \_\_\_\_\_ (select the most important factor) \*

b) study controls for any additional factor \* (This criteria could be modified to indicate specific control for a second important factor.)

**Outcome**

1) Assessment of outcome

a) independent blind assessment \*

b) record linkage \*

c) self-report

d) no description

2) Was follow-up long enough for outcomes to occur

a) yes (select an adequate follow up period for outcome of interest) \*

b) no

3) Adequacy of follow up of cohorts

a) complete follow up - all subjects accounted for \*

b) subjects lost to follow up unlikely to introduce bias - small number lost - > \_\_\_\_ % (select an adequate %) follow up, or description provided of those lost) \*

c) follow up rate < \_\_\_\_ % (select an adequate %) and no description of those lost

d) no statement

---

**Supplementary Table S2.** Quality scores of included studies on vitamin D status and SGA.1  
2  
3  
4  
5  
6  
7  
8  
9  
10  
11  
12  
13  
14  
15  
16  
17  
18  
19  
20  
21  
22  
23  
24  
25  
26  
27  
28  
29  
30  
31  
32  
33  
34  
35  
36  
37  
38  
39  
40  
41  
42  
43  
44  
45  
46  
47  
48  
49  
50  
51  
52  
53  
54  
55  
56  
57  
58  
59  
60

| Study                   | Selection                                |                                     |                           | Comparability                                                            |                                                             | Outcome               |                                                 | Total scores |                                  |
|-------------------------|------------------------------------------|-------------------------------------|---------------------------|--------------------------------------------------------------------------|-------------------------------------------------------------|-----------------------|-------------------------------------------------|--------------|----------------------------------|
|                         | Representativeness of the exposed cohort | Selection of the non-exposed cohort | Ascertainment of exposure | Demonstration that outcome of interest was not present at start of study | Comparability of cohorts on the basis of design or analysis | Assessment of outcome | Was follow-up long enough for outcomes to occur |              | Adequacy of follow up of cohorts |
| Leffelaar <sup>14</sup> | 1                                        | 1                                   | 1                         | 1                                                                        | 1                                                           | 1                     | 1                                               | 1            | 8                                |
| Burris <sup>23</sup>    | 1                                        | 1                                   | 1                         | 1                                                                        | 1                                                           | 1                     | 1                                               | 0            | 7                                |
| Zhou <sup>24</sup>      | 1                                        | 1                                   | 1                         | 1                                                                        | 1                                                           | 1                     | 1                                               | 1            | 8                                |
| Choi <sup>25</sup>      | 1                                        | 1                                   | 1                         | 1                                                                        | 1                                                           | 1                     | 0                                               | 0            | 6                                |
| Ong <sup>17</sup>       | 1                                        | 1                                   | 1                         | 1                                                                        | 2                                                           | 1                     | 1                                               | 0            | 8                                |
| Kiely <sup>26</sup>     | 1                                        | 0                                   | 1                         | 1                                                                        | 1                                                           | 1                     | 1                                               | 0            | 6                                |
| Scholl <sup>27</sup>    | 1                                        | 1                                   | 1                         | 1                                                                        | 2                                                           | 0                     | 1                                               | 1            | 8                                |
| Chen <sup>4</sup>       | 1                                        | 1                                   | 1                         | 1                                                                        | 0                                                           | 1                     | 1                                               | 0            | 6                                |
| Boyle <sup>28</sup>     | 1                                        | 1                                   | 1                         | 1                                                                        | 1                                                           | 1                     | 1                                               | 0            | 7                                |
| Berg <sup>29</sup>      | 1                                        | 1                                   | 1                         | 1                                                                        | 1                                                           | 1                     | 1                                               | 0            | 7                                |
| Gerand <sup>15</sup>    | 1                                        | 1                                   | 1                         | 1                                                                        | 0                                                           | 1                     | 1                                               | 0            | 6                                |
| Miliku <sup>30</sup>    | 1                                        | 1                                   | 1                         | 1                                                                        | 1                                                           | 1                     | 1                                               | 0            | 7                                |
| Nobles <sup>16</sup>    | 1                                        | 1                                   | 1                         | 1                                                                        | 1                                                           | 1                     | 1                                               | 1            | 8                                |

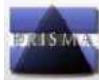

# PRISMA 2009 Checklist

1  
2  
3  
4  
5  
6  
7  
8  
9  
10  
11  
12  
13  
14  
15  
16  
17  
18  
19  
20  
21  
22  
23  
24  
25  
26  
27  
28  
29  
30  
31  
32  
33  
34  
35  
36  
37  
38  
39  
40  
41  
42  
43  
44  
45  
46  
47  
48  
49

| Section/topic                      | #  | Checklist item                                                                                                                                                                                                                                                                                              | Reported on page #                         |
|------------------------------------|----|-------------------------------------------------------------------------------------------------------------------------------------------------------------------------------------------------------------------------------------------------------------------------------------------------------------|--------------------------------------------|
| <b>TITLE</b>                       |    |                                                                                                                                                                                                                                                                                                             |                                            |
| Title                              | 1  | Identify the report as a systematic review, meta-analysis, or both.                                                                                                                                                                                                                                         | P1: Line 1                                 |
| <b>ABSTRACT</b>                    |    |                                                                                                                                                                                                                                                                                                             |                                            |
| Structured summary                 | 2  | Provide a structured summary including, as applicable: background; objectives; data sources; study eligibility criteria, participants, and interventions; study appraisal and synthesis methods; results; limitations; conclusions and implications of key findings; systematic review registration number. | P2: Line 15-42                             |
| <b>INTRODUCTION</b>                |    |                                                                                                                                                                                                                                                                                                             |                                            |
| Rationale                          | 3  | Describe the rationale for the review in the context of what is already known.                                                                                                                                                                                                                              | P3-4: Line 45-75                           |
| Objectives                         | 4  | Provide an explicit statement of questions being addressed with reference to participants, interventions, comparisons, outcomes, and study design (PICOS).                                                                                                                                                  | P3-4: Line 45-75                           |
| <b>METHODS</b>                     |    |                                                                                                                                                                                                                                                                                                             |                                            |
| Protocol and registration          | 5  | Indicate if a review protocol exists, if and where it can be accessed (e.g., Web address), and, if available, provide registration information including registration number.                                                                                                                               | No registration                            |
| Eligibility criteria               | 6  | Specify study characteristics (e.g., PICOS, length of follow-up) and report characteristics (e.g., years considered, language, publication status) used as criteria for eligibility, giving rationale.                                                                                                      | P4-P5: Line 89-104                         |
| Information sources                | 7  | Describe all information sources (e.g., databases with dates of coverage, contact with study authors to identify additional studies) in the search and date last searched.                                                                                                                                  | P4: Line 78-84                             |
| Search                             | 8  | Present full electronic search strategy for at least one database, including any limits used, such that it could be repeated.                                                                                                                                                                               | P4: Line 82-84<br>(supplementary Box S1)   |
| Study selection                    | 9  | State the process for selecting studies (i.e., screening, eligibility, included in systematic review, and, if applicable, included in the meta-analysis).                                                                                                                                                   | figure 1                                   |
| Data collection process            | 10 | Describe method of data extraction from reports (e.g., piloted forms, independently, in duplicate) and any processes for obtaining and confirming data from investigators.                                                                                                                                  | P5: Line 105-125                           |
| Data items                         | 11 | List and define all variables for which data were sought (e.g., PICOS, funding sources) and any assumptions and simplifications made.                                                                                                                                                                       | P5: Line 109-125                           |
| Risk of bias in individual studies | 12 | Describe methods used for assessing risk of bias of individual studies (including specification of whether this was done at the study or outcome level), and how this information is to be used in any data synthesis.                                                                                      | P5: Line 119-125<br>(supplementary Box S2) |
| Summary measures                   | 13 | State the principal summary measures (e.g., risk ratio, difference in means).                                                                                                                                                                                                                               | P5-6: Line 114-133                         |
| Synthesis of results               | 14 | Describe the methods of handling data and combining results of studies, if done, including measures of consistency (e.g. $I^2$ for each meta-analysis).                                                                                                                                                     | P5-6: Line 127-144                         |

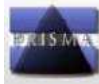

# PRISMA 2009 Checklist

Page 1 of 2

| Section/topic                 | #  | Checklist item                                                                                                                                                                                           | Reported on page #                       |
|-------------------------------|----|----------------------------------------------------------------------------------------------------------------------------------------------------------------------------------------------------------|------------------------------------------|
| Risk of bias across studies   | 15 | Specify any assessment of risk of bias that may affect the cumulative evidence (e.g., publication bias, selective reporting within studies).                                                             | P6: Line 140-144                         |
| Additional analyses           | 16 | Describe methods of additional analyses (e.g., sensitivity or subgroup analyses, meta-regression), if done, indicating which were pre-specified.                                                         | P6: Line 133-144                         |
| <b>RESULTS</b>                |    |                                                                                                                                                                                                          |                                          |
| Study selection               | 17 | Give numbers of studies screened, assessed for eligibility, and included in the review, with reasons for exclusions at each stage, ideally with a flow diagram.                                          | P6: Line 147-152 (figure 1)              |
| Study characteristics         | 18 | For each study, present characteristics for which data were extracted (e.g., study size, PICOS, follow-up period) and provide the citations.                                                             | P6-7: Line 153-167 (table 1)             |
| Risk of bias within studies   | 19 | Present data on risk of bias of each study and, if available, any outcome level assessment (see item 12).                                                                                                | Supplementary table S2 and table 3       |
| Results of individual studies | 20 | For all outcomes considered (benefits or harms), present, for each study: (a) simple summary data for each intervention group (b) effect estimates and confidence intervals, ideally with a forest plot. | table 1 and figure 2                     |
| Synthesis of results          | 21 | Present results of each meta-analysis done, including confidence intervals and measures of consistency.                                                                                                  | P7: Line 169-172 (figure 2)              |
| Risk of bias across studies   | 22 | Present results of any assessment of risk of bias across studies (see Item 15).                                                                                                                          | P8: Line 195-197 (figure 3)              |
| Additional analysis           | 23 | Give results of additional analyses, if done (e.g., sensitivity or subgroup analyses, meta-regression [see Item 16]).                                                                                    | P7-8: Line 173-197 (table 2 and table 3) |
| <b>DISCUSSION</b>             |    |                                                                                                                                                                                                          |                                          |
| Summary of evidence           | 24 | Summarize the main findings including the strength of evidence for each main outcome; consider their relevance to key groups (e.g., healthcare providers, users, and policy makers).                     | P8-10: Line 199-263                      |
| Limitations                   | 25 | Discuss limitations at study and outcome level (e.g., risk of bias), and at review-level (e.g., incomplete retrieval of identified research, reporting bias).                                            | P10-11: Line 268-276                     |
| Conclusions                   | 26 | Provide a general interpretation of the results in the context of other evidence, and implications for future research.                                                                                  | P11: Line 277-282                        |
| <b>FUNDING</b>                |    |                                                                                                                                                                                                          |                                          |
| Funding                       | 27 | Describe sources of funding for the systematic review and other support (e.g., supply of data); role of funders for the systematic review.                                                               | P11: Line 287-288                        |
