# Supplementary material for: Association between maternal vitamin D deficiency and small for gestational age: evidence from a meta-analysis of prospective cohort studies
Source: PubMed Central journal article supplement (PMC5629738; doi:10.1136/bmjopen-2017-016404), 2017-08-27
Supplement: bmjopen-2017-016404supp001.pdf [file bmjopen-2017-016404supp001.pdf]

**Supplementary Box S1.** The search strategy of PubMed

---

Source: PubMed

Search on: February 28th, 2017

#1 (((("vitamin D"[Mesh] OR "cholecalciferol"[Mesh]) OR "25-hydroxyvitamin D"[Title/Abstract]) OR "25(OH)D"[Title/Abstract])

#2 (((("small for gestational age"[Title/Abstract] OR "small-for-gestation-age"[Title/Abstract]) OR "small size for gestational age"[Title/Abstract]) OR SGA [Title/Abstract])

#3 #1 AND #2

---

The search strategy in other databases did some adjustments on the basis of the above database.

**Supplementary Table S1.** Characteristics of the included studies in the present meta-analysis

| Author                  | Latitude                                     | The time of year data collected | Gestational age of infant at birth | The prevalence of SGA | The prevalence of vitamin D deficiency | Maternal education status                                                 | Season of blood sample                                       |
|-------------------------|----------------------------------------------|---------------------------------|------------------------------------|-----------------------|----------------------------------------|---------------------------------------------------------------------------|--------------------------------------------------------------|
| Leffelaar <sup>15</sup> | NA                                           | 2003.2~2004.3                   | 40.1±1.2 weeks                     | 9.2%                  | 23.1%                                  | ≤5 years (17.2%), 6-10years (38.5%), ≥11 years (44.3%)                    | Summer (43.6%)                                               |
| Burris <sup>24</sup>    | NA                                           | NA                              | 39.6 weeks                         | 4.8%                  | 32.4%                                  | College graduate (41.2%)                                                  | NA                                                           |
| Zhou <sup>25</sup>      | 23.1°N                                       | 2010.9~2011.8                   | NA                                 | 0.6%                  | 18.9%                                  | NA                                                                        | NA                                                           |
| Choi <sup>26</sup>      | 36.0°N                                       | 2012.4~2013.9                   | NA                                 | 10.9%                 | 77.3%                                  | ≤12 years(5.5%), > 12 years(94.5%)                                        | Spring (44.5%), Summer (10.0%), Fall (39.5%), Winter (5.9%)  |
| Ong <sup>18</sup>       | 1°22'N                                       | NA                              | NA                                 | 9.1%                  | 13.2%                                  | Primary and secondary (30.2%), Post-secondary (35.4%), University (34.4%) | NA                                                           |
| Kiely <sup>27</sup>     | 52°N                                         | 2008.3~2011.2                   | NA                                 | 10.7%                 | 44.0%                                  | Secondary (61%), Tertiary (39%)                                           | Winter (58.5%), Summer (41.5%)                               |
| Scholl <sup>28</sup>    | NA                                           | 2001~2007                       | 38.5                               | 7.2%                  | 33.7%                                  | NA                                                                        | NA                                                           |
| Chen <sup>4</sup>       | 31°52'N                                      | 2008.11~2010.10                 | NA                                 | 8.9%                  | 38.41%                                 | NA                                                                        | Spring (36.7%), Summer (22.5%), Fall (20.6%), Winter (20.2%) |
| Boyle <sup>29</sup>     | NA                                           | 2005~2008                       | NA                                 | 9.9%                  | 21.5%                                  | NA                                                                        | Spring (20.5%), Summer (26.4%), Fall (23.2%), Winter (29.8%) |
| Berg <sup>30</sup>      | 52°22'N                                      | 2003.2~2004.3                   | 20-42 weeks                        | 9.1%                  | NA                                     | NA                                                                        | Winter (55.5%)                                               |
| Gerard <sup>16</sup>    | ≥41°N(63.0%),<br>38~40°N(28.8%), ≤35°N(8.2%) | 1959~1965                       | 39.7±1.3 weeks                     | 18.4%                 | 34.8%                                  | NA                                                                        | Spring (25.9%), Summer (25.7%), Fall (24.6%), Winter (23.9%) |
| Miliku <sup>31</sup>    | NA                                           | 2002.4~2006.1                   | 35.9-42.3 weeks                    | 5.0%                  | 53.2%                                  | No higher education (59.2%), Higher education (40.8%)                     | Spring (29.5%), Summer (22.9%), Fall (24.0%), Winter (23.6%) |
| Nobles <sup>17</sup>    | NA                                           | 2007~2012                       | NA                                 | 9.6%                  | 20.7%                                  | ≤High school (55.2%), > High school (44.8%)                               | Summer (41.4%), Winter (58.7%)                               |

NA : not available.

**NEWCASTLE - OTTAWA QUALITY ASSESSMENT SCALE**  
**COHORT STUDIES**

Note: A study can be awarded a maximum of one star for each numbered item within the Selection and Outcome categories. A maximum of two stars can be given for Comparability

**Selection**

- 1) Representativeness of the exposed cohort
  - a) truly representative of the average \_\_\_\_\_ (describe) in the community \*
  - b) somewhat representative of the average \_\_\_\_\_ in the community \*
  - c) selected group of users eg nurses, volunteers
  - d) no description of the derivation of the cohort
- 2) Selection of the non-exposed cohort
  - a) drawn from the same community as the exposed cohort \*
  - b) drawn from a different source
  - c) no description of the derivation of the non-exposed cohort
- 3) Ascertainment of exposure
  - a) secure record (eg surgical records) \*
  - b) structured interview \*
  - c) written self-report
  - d) no description
- 4) Demonstration that outcome of interest was not present at start of study
  - a) yes \*
  - b) no

**Comparability**

- 1) Comparability of cohorts on the basis of the design or analysis
  - a) study controls for \_\_\_\_\_ (select the most important factor) \*
  - b) study controls for any additional factor \* (This criteria could be modified to indicate specific control for a second important factor.)

**Outcome**

- 1) Assessment of outcome
    - a) independent blind assessment \*
    - b) record linkage \*
    - c) self-report
    - d) no description
  - 2) Was follow-up long enough for outcomes to occur
    - a) yes (select an adequate follow up period for outcome of interest) \*
    - b) no
  - 3) Adequacy of follow up of cohorts
    - a) complete follow up - all subjects accounted for \*
    - b) subjects lost to follow up unlikely to introduce bias - small number lost - > \_\_\_\_ % (select an adequate %) follow up, or description provided of those lost) \*
    - c) follow up rate < \_\_\_\_ % (select an adequate %) and no description of those lost
    - d) no statement
-
